# Supplementary material for: Uncovering Genomic Regions Associated With 36 Agro-Morphological Traits in Indian Spring Wheat Using GWAS
Source: Front Plant Sci. 2019 Apr 25;10:527. doi: 10.3389/fpls.2019.00527 (PMC6511880; doi:10.3389/fpls.2019.00527)
Supplement: Supplementary file 7 [file Table_1.xlsx]

## Sheet: 36 Traits
Additional Table S1: Details of various traits used in present study along with the type of observational data
S.No.	Traits		$States (#)	States scoring	Data Type a	Shannon diversity index in panel of 404 genotypes	Allele in panel of 404 genotypes	Shannon diversity index in 7000 lines	Allele in 7000 lines
1	Coleoptile Color (anthocyanin)	C_Col	Absent(376) ,Present(26)	1,9	n	0.239	2	0.377	2
2	Plant Growth Habit	PGH	Erect (74), Semi-erect (34), Intermediate (68), Semi-prostrate (216), Prostrate (10)	1,3,5,7,9	o	1.246	5	1.042	5
3	Foliage Colour	Fol_Col	Pale green (31), Green (290), Dark green (81)	1,5,9	n
4	Flag leaf : Anthocyanin coloration of auricle	Aur_col	Absent (350), Medium (35), Very strong (17)	1,5,9	n	0.465	3	0.624	3
5	Flag leaf : Hairs on Auricle	Aur_Pub	Absent (246), Medium (150), Strong (6)	3,5,7	o	0.731	3	1.097	3
6	Plant : Flag leaf attitude	Leaf_Att	Erect (22), Semi- Erect (224), Drooping (156)	1,3,5	n
7	Days to Heading	DTH	first spikelet visible on 50% of ears		q
8	Flag leaf: Waxiness of sheath	Wax_LS	Absent (49), Weak (68), Medium (145), Strong (115), Very strong (25)	1,3,5,7,9	o	1.456	5	1.298	5
9	Flag leaf: Waxiness of blade	Wax_LB	Absent (182), Weak (96), Medium (85), Strong (33), Very strong (6)	1,3,5,7,9	o	1.296	5	0.995	5
10	Ear: Waxiness	Wax_Ear	Absent (138), Weak (102), Medium (117), Strong (32), Very strong (13)	1,3,5,7,9	o	1.385	5	1.296	5
11	Peduncle: Waxiness of neck	Wax_Ped	Absent (54), Weak (76), Medium (138), Strong (108), Very strong (26)	1,3,5,7,9	o	1.482	5	1.311	5
12	Flag leaf: Length	Leaf_L	Average flag leaf length of two plants per genotypes (cm)		q
13	Flag leaf: Width	Leaf_Br	Narrow (1), Medium (156), Broad (245)	1,5,9	q
14	Plant: Length (excluding awns/ scurs)	PH	measured from base of the plant to the tip of spike (cm)		q
15	Ear: Shape in profile	Ear _S	Tapering (301), Parallel sided (98), Club shaped (3), Fusiform (0)	1,2,3,4	n	0.601	3	0.619
16	Ear: Density	Ear_D	Very lax (0), Lax (49), Medium (238), Dense (113), very Dense (2)	1,3,5,7,9	o	0.948	4	1.093
17	Ear (spike) Length	SL	From base to the top of earhead		q
18	Awns or scurs: Presence	Awn_P	Both absent (2), Scurs present (14), Awns present (386)	1,2,3	b	0.19	3	0.407
19	Awns: Length	Awn_L	measured from 1/3 middle part of ear at maturity and averaged		q	1.575	6	1.286	5
20	Awn: Colour	Awn_Col	White (209), Light brown (140), Dark brown (30), Black (7)	1,2,3,4	n	1.098	5	0.901
21	Awn: Attitude	Awn_Att	Appressed (47), Medium (146), Spreading (193)	1,2,3	n
22	Outer glume: Pubescence	Glu_Pub	Absent (354), Medium (32), Very strong (16)	3,5,7	o	0.448	3	0.557	3
23	Ear: Colour	Ear _Col	White (272), Light brown (100), Dark brown (30)	1,2,3	n	0.802	3	0.59	4
24	Lower glume: Shoulder width (spikelets in mid- third of ear)	Sh_Wid	Absent (11), Narrow (234), Medium (94), Broad (62), Very broad (1)	1,3,5,7,9	n
25	Lower glume: Shoulder shape (as for 25)	Shl_Sh	Sloping (184), Round (72), Straight (62), Elevated (84), Strongly elevated (0) with 2nd point present	1,3,5,7,9	n	1.279	4
26	Lower glume: Beak length (as for 25)	Beak_L	Very short (15), Short (107), Medium (162), Long (107), Very long (11)	1,3,5,7,9	q	1.29	5	1.478	5
27	Lower glume: Beak shape (as for 25)	Beak_Sh	Straight (143), Moderately curved (256), Strongly curved (3), Geniculate (0)	1,2,3,4	n	0.693	3	0.874	4
28	Peduncle : Attitude	Ped_Att	Straight (236), Bent (165), Crooked (1)	3,5,9	q
29	Grain: Colouration with phenol	Grn_Ph	None (16), Light (11), Medium (120), Dark (169), Very dark (86)	1,3,5,7,9	n			0.857
30	Grain: Colour	Grn_Col	White (11), Amber (385), Red (6)	1,2,3	n	0.202	3	0.72
31	Grain : Shape	Grn_Sh	Round (0), Ovate (72), Oblong (310), Elliptical (20)	1,2,3,4	n	0.659	3	0.857
32	Grain: Germ width	Germ_Wid	Narrow (39), Medium (278), Wide (85)	3,5,7	o	0.808	3	0.808
33	Brush hair : Length	Brush_L	Absent / short (117), Medium (180), Long (105)	3,5,7	o	1.07	3	1.059
34	Seed : Size (weight of 1000 grains)	Grn_ Size	Small (100), Medium (152), Large (150), Very large (0)	3,5,7,9	q	1.082	3	1.201
35	Grain : Hardness	Grn_Tex	Soft (42), Semi-hard (259), Hard (101)	3,5,7	q	0.866	3	1.39
36	Days to Maturity	DTM	50% plants showed their peduncle dried due to physiological maturity		q
a Data Type
b:binary; o:ordinal; n:nominal; q:quantitative
$ States (#): '#'indicates the number of genotypes for qualitative traits in study panel
