# Supplementary material for: Uncovering Genomic Regions Associated With 36 Agro-Morphological Traits in Indian Spring Wheat Using GWAS
Source: Front Plant Sci. 2019 Apr 25;10:527. doi: 10.3389/fpls.2019.00527 (PMC6511880; doi:10.3389/fpls.2019.00527)
Supplement: Supplementary file 8 [file Table_2.xlsx]

## Sheet: Pedigree
Additional Table S2: List of genotypes along with their available pedigree and other relevant information
S. No.	Genotypes	Pedigree	Category	Year of Release	Zone a	Season Type b	Sub-population	Genetic stock traits
1	IC296432	WL 711* 4/ Aegilops geniculata Acc. 3547	Genetic Stock	---	---	---	3	---
2	GW496	HD2285/4/CNO/NO//CC/INIA 66/3/KAL/BB	Variety	1990	GUJARAT	---	3	---
3	WH1126	WBLL 1*2/VIVITSII	Improved Genotype	---	---	---	1	---
4	LGM133	LOCAL COLL.GUJARAT	Landraces	---	---	---	3	---
5	HUW12	NP 876 / CIANO 66	Variety	1980	NEPZ	---	3	---
6	GL27	LOCAL COLL.GUJARAT	Indigenous Collection	---	---	---	2	---
7	GW200218	DL51-91/GW265	Genetic Stock	---	---	---	3	---
8	MACS6145	C306+LR28	Variety	2002	NEPZ	---	2	---
9	Lok41	---	Improved Genotype	---	---	---	3	---
10	MACS6222	HD 2189*2//MACS 2496	Variety	2010	PZ	---	1	---
11	GL23	LOCAL COLL.GUJARAT	Indigenous Collection	---	---	---	2	---
12	MP1201	CMH-82-A-1294/2*KAUZ//MUNIA/CHORLITO/3/MILAN	Variety	---	---	---	1	---
13	IC321855	SK 10,LOCAL COLL.FROM SIRSA, GWALIOR,MP	Indigenous Collection	---	---	---	2	---
14	GW173	TW-275-7-6-10/LOK-1	Variety	1994	CZ	---	3	---
15	HTW11	Heat Tolerant Stock	Genetic Stock	---	---	---	2	Heat TolerantStock
16	L5(AL)	LOCALCOLL.LAHAUL/SPITI	Indigenous Collection	---	---	---	2	---
17	HS365	HS 207 /SONALIKA	Variety	1998	NHZ	---	3	---
18	PBW175	HD 2160 /WG 1025	Variety	1989	NWPZ	---	1	---
19	IC322001	SK 156,VIKAS GEHUN LOCAL WHEAT FROM GOPESHWAR	Indigenous Collection	---	---	---	3	---
20	RNB1001	HD2687/MACS2846	Genetic Stock	---	---	---	3	multiple rust resistance
21	IC322007A	SK 162, LOCAL WHEAT FROM CHAMOLI	Indigenous Collection	---	---	---	2	---
22	KRL35	HD-2160/KRL-1-4 (KHARCHIA-LOCAL/WL-711)	Genetic Stock	---	---	---	3	Salt Tolerant and water lodging tolerant
23	MBL5	NP4/HB209	Genetic Stock	---	---	---	3	---
24	IC321979	SK 134,LATE LOCAL VARIANT FROM NAGNI,CHAMBA	Indigenous Collection	---	---	---	1	---
25	WH730	---	Improved Genotype	---	---	---	1	Heat TolerantStock
26	WH1061	WEAWER/WL 2926//SW 89.3064	Improved Genotype	---	---	---	3	---
27	HPW251	WW-24/LEMHI/P-2-II-149	Variety	2007	NHZ	---	1	---
28	NIAW917	GW 244/BOB WHITE	Variety	2005	PZ	TS, IR	1	---
29	PusaT3336	LOKBHARTI/DWARF 7 KITE	Genetic Stock	---	---	---	3	leaf blight resistant
30	GL6	LOCAL COLL.GUJARAT	Indigenous Collection	---	---	---	2	---
31	LGM245	LOCAL COLL.GUJARAT	Indigenous Collection	---	---	---	2	---
32	HPW266	CH-01-X/STAR/3/HE-1/3*CIANO-79/2*SERI-82	Improved Genotype	---	---	---	1	---
33	HW2001	SONALIKA//TR-380-14*7/3-AG-14/3/5*SONALIKA	Genetic Stock	---	---	---	3	---
34	ISD215	K.S./T.turgidum//h38/3/SKA//T.carthlicum//33/SKA/BLUEBIRD//HD2122	Genetic Stock	---	---	---	3	---
35	WH423	---	Improved Genotype	---	---	---	1	---
36	LGM251	LOCAL COLL.GUJARAT	Indigenous Collection	---	---	---	2	---
37	VL639	VL421/CPAN1535	Genetic Stock	---	---	---	3	loose smut resistant
38	LALBAHADUR	S-54723/RS-31-1	Variety	1971	NWPZ	---	3	---
39	NIAW34	CNO 79/PRL “S”	Variety	1997	MAH	---	1	---
40	Pusa2019A	CS CMS*7/HW2019	Genetic Stock	---	---	---	1	---
41	HS240	AVOCA/KALYANSONA/BLUEBIRD/WOODPECKER(SIB)/(SIB)PAVON-76	Variety	1989	NHZ	---	3	---
42	IC321899	SK 54,RAIFED LOCAL WHEAT FROM BHATARWAR,MP	Indigenous Collection	---	---	---	2	---
43	NP852	KENYA-FARMER/2*NP-761	Variety	1969	NEPZ	---	1	---
44	FLW29	PBW343/CAPPELLE DESPREZ/PBW343/Lr28(CS2D2M3/8)F7	Genetic Stock	---	---	---	1	resistance to brown,yellow and black rust
45	HW5205	CIANO-67/MARIS-FUNDIN//MONCHO(SIB)/3/SERI-82	Improved Genotype	---	---	---	3	---
46	K68	NP-773/K-13	Variety	1968	Uttar Pradesh	---	2	---
47	UP262	SONALIKA(S-308)/BAJIO-66	Variety	1977	NEPZ	---	3	---
48	K9107	K-8101/K-68	Variety	1996	NEPZ	---	1	Karnal Bunt Tolerant
49	PBW343	NORD-DESPREZ/VG-1944//KALYANSONA//BLUEBIRD/3/YACO(SIB)/4/VEERY-5	Variety	1996	NWPZ	---	1	tolerant to lodging
50	AKAW42106	3rd SSN-DF-99-186-Sel	Variety	---	---	---	3	---
51	LGM135	LOCAL COLL.GUJARAT	Indigenous Collection	---	---	---	2	---
52	VL892	WH 542/PBW 226	Variety	2007	NHZ	---	3	---
53	IC321879	SK 34,LONG SPIKED LOCAL FROM KASHIPUR,MP	Indigenous Collection	---	---	---	3	---
54	IC321913	SK 68,TALL BLACK AWNED DURUM FROM SIRSA VILL.MP	Indigenous Collection	---	---	---	2	---
55	LGM136	LOCAL COLL.GUJARAT	Indigenous Collection	---	---	---	2	---
56	K0617	HD 2733/K 9423/K 9351	Improved Genotype	---	---	---	3	---
57	NAPHAL	Local landrace	Indigenous Collection	---	---	---	3	---
58	HD3146	HUW510/CBW17	Improved Genotype	---	---	---	1	---
59	MACS6273	KAUZ*2/CHEN//BCN/MILAN	Improved Genotype	---	---	---	1	---
60	HS592	CMH82A.1294/2*KAUZ//MUNIA/CHTO/3/MILAN	Improved Genotype	---	---	---	1	---
61	WH1157	MUNIA/CHTO/AMSEL	Improved Genotype	---	---	---	1	---
62	HI1563	MACS 2496*2/MC 10	Variety	---	---	---	3	---
63	RSP561	HD2637/Ae. crassa// HD2687	Variety	---	---	---	3	---
64	AKAW4627	WH 147/SUNSTAR*/C 80.1	Variety	---	---	---	3	---
65	HPW411	HPW155/HD29	Improved Genotype	---	---	---	3	---
66	MACS2496	SERI	Improved Genotype	1991	PZ	---	1	---
67	PBW704	HP1887/PBW565	Improved Genotype	---	---	---	1	---
68	C306	REGENT-1974/CH-23//2*C-591/3/P-19/C-281	Variety	1969	NWPZ/NEPZ	---	2	DROUGHT TOLERANT
69	HS590	HS469/DL460	Improved Genotype	---	---	---	1	---
70	K8027	NP875/4/N10B/Y53//Y50/3/KT54B/5/2*K852	Variety	1989	NEPZ	TS, RF	3	---
71	VL3002	VW0185/F81513/MILAN	Improved Genotype	---	---	---	1	---
72	WH1100	PBW 65/ 2*PASTOR	Improved Genotype	---	---	---	1	---
73	HD3128	VL849/HW5015	Improved Genotype	---	---	---	1	---
74	HD3118	ATTILA*2/PBW-65//WEEBILL-1*2/TUKURU	Variety	---	---	---	1	---
75	HS594	HS469/EC463658	Improved Genotype	---	---	---	1	---
76	MACS6507	WG2780/JB1002	Improved Genotype	---	---	---	1	---
77	PBW723	PBW343+Lr57/Yr40+Yr15	Variety	---	---	---	1	---
78	HPW347	KAUZ//ALTAR84/AOS/3/MILAN/KAUZ/4/HUITES	Improved Genotype	---	---	---	1	---
79	PBW698	BW9250*3/YR10/6*AVOCET/3/BW9250*3//YR15/6*AVOCET	Improved Genotype	---	---	---	1	---
80	MACS6604	WAXWING/4/SNI/TRAP#1/3/KAUZ*2/TRAP//KAUZ	Improved Genotype	---	---	---	1	---
81	HPW400	PRL/*2PASTOR	Improved Genotype	---	---	---	1	---
82	WH1154	WH337/HD2255//RAJ3077	Improved Genotype	---	---	---	1	---
83	KB2012-03	PBW343*6/KBRL22	Improved Genotype	---	---	---	1	---
84	VL3006	VL738/VL832//NIAW699	Improved Genotype	---	---	---	3	---
85	HW5207-1	HW3029/Yr15	Improved Genotype	---	---	---	3	---
86	UP2890	INQUALAB*2/TUKURU//UP2382	Improved Genotype	---	---	---	3	---
87	MP3288	DOVE/BUC/DL 788-2	Variety	2011	CZ	TS, RF	1	---
88	DBW126	CROC_1/A.SQUARROSA(205)//BORLAUG95/3/ATTILA/4/HD2765	Improved Genotype	---	---	---	1	---
89	HD2781	BOBWHITE/C-306/C-591/HW-2004	Variety	2002	PZ	---	1	---
90	HD3055	OASIS/SKAUZ//4*BCM/2*PASTOR	Improved Genotype	---	---	---	1	---
91	HS593	BAVIS	Improved Genotype	---	---	---	1	---
92	HUW679	HUW510/HUW533//PBW476	Improved Genotype	---	---	---	2	---
93	DBW129	PFAU/MILAN/5/CHEN/A.SQUARROSA (TAUS)/BCN/3/VEE#7/BOW/4/PASTOR	Improved Genotype	---	---	---	1	---
94	HPW349	OASIS/SKAUZ//4*BACANORA-88/3/PASTOR/4/KAUZ*2/YACO//KAUZ	Variety	---	---	---	1	---
95	HS547	CHIRYA3/HS396	Improved Genotype	---	---	---	1	---
96	DBW39	ATTILA/HUI	Variety	---	---	---	1	---
97	HS277	KAVKAZ(w)/(s)CIGUENA	Variety	1992	NHZ	---	1	---
98	VL3005	HD2844/PBW486	Improved Genotype	---	---	---	1	---
99	PBW660	WG 6761 / WG 6798	Variety	---	---	---	1	---
100	WH1124	MUNIA/CHORLITO//AMSEL	Variety	---	---	---	3	---
101	HS562	OASIS/SUPER-KAUZ//4*BACANORA-88/3/2*PASTOR	Variety	---	---	---	1	---
102	HD3132	WH542/UP2425	Improved Genotype	---	---	---	1	---
103	PBW689	PBW442/WH576//DWR232	Improved Genotype	---	---	---	3	---
104	NIAW1885	ALTAR84/A/SQUARROSA/TAUS//OPATA/3/ATTILA	Improved Genotype	---	---	---	1	---
105	WH1132	PBW65*2/PASTOR	Improved Genotype	---	---	---	1	---
106	HS490	HS-364/HPW-114//HS-240/HS-346	Variety	2007	NHZ	---	3	---
107	VL804	CPAN 3018 /CPAN 3004 //PBW 65	Variety	2002	NHZ	---	1	---
108	HS558	KEHA10*2/3/OASIS/SKAUZ//4*BCN	Improved Genotype	---	---	---	1	---
109	VL946	HW 2045/ VW 0185	Improved Genotype	---	---	---	3	---
110	KHARCHIA65	KHARCHIA LOCAL/ EG 953	Variety	1970	ALL ZONES	---	2	---
111	PBW706	MINO/898.97	Improved Genotype	---	---	---	1	---
112	HD3071	BOW/2*C306//HW2004/PBW175	Improved Genotype	---	---	---	2	---
113	HD2985	PBW 343/PASTOR	Variety	---	---	---	3	---
114	HPW348	EFED/FINSI	Improved Genotype	---	---	---	1	---
115	HS577	HW2045/HS435	Improved Genotype	---	---	---	1	---
116	HD3133	Milan/S.87230//BABAX	Improved Genotype	---	---	---	1	---
117	VL959	VL830/BUDIFEN//VL829	Improved Genotype	---	---	---	1	---
118	PBW722	PBW343+Lr57/Yr40+Lr37+Yr17	Improved Genotype	---	---	---	1	---
119	DBW155	HUW548/Mv231-98	Improved Genotype	---	---	---	1	---
120	VL977	VL832/DRUCHAMP//PHR1012	Improved Genotype	---	---	---	3	---
121	UP2891	HUW562/(CROC_1/A.SQU(205)//BORL95/3/2*MILAN	Improved Genotype	---	---	---	3	---
122	HI1579	KAUZ//ALTAR84/AOS/3/MILAN/KAUZ/4/HUITES	Improved Genotype	---	---	---	1	---
123	VL1003	HD2747/ZANDER13	Improved Genotype	---	---	---	1	---
124	K1217	HUW468/NW2036	Improved Genotype	---	---	---	1	---
125	PBW621	KAUZ//ALTAR84/AOS/3/MILAN/KAUZ/4/HUITES	Variety	---	---	---	1	---
126	HUW661	W15.92/4/PASTOR/HXL7573/2*BAU/3/WBLL1	Improved Genotype	---	---	---	1	---
127	HS526	CMH82A.1294/2*KAUZ//MUNIA/CHTO/3/MILAN	Improved Genotype	---	---	---	1	---
128	HPW360	WL711/HPW89	Improved Genotype	---	---	---	1	---
129	MP1277	GW190/MP1142	Improved Genotype	---	---	---	1	---
130	MMBL283	HUW234*2/Tc Lr25	Improved Genotype	---	---	---	3	---
131	CG1010	KYZ0144/KYZ283	Improved Genotype	---	---	---	3	---
132	HUW675	ALTAR84/KAUZ//MILAN/HUW510	Improved Genotype	---	---	---	1	---
133	HPW401	UP2571/HD2760	Improved Genotype	---	---	---	1	---
134	HPW412	HD29/HS240	Improved Genotype	---	---	---	3	---
135	DBW107	TUKURU/INQALAB91	Variety	---	---	---	1	---
136	PBW681	UP2338/KALYANSONA	Improved Genotype	---	---	---	1	---
137	HPW373	MILAN//BUC/CHRC/3/MESTO	Improved Genotype	---	---	---	1	---
138	PBW693	WH890-AE.UMB.3723AMPH/CS(S)//WL711NN/3/PBW343	Improved Genotype	---	---	---	1	---
139	DBW90	HUW-468/WH-730	Variety	---	---	---	1	---
140	NIAW1415	GW-9506/PARULA//PARULA	Variety	---	---	---	1	---
141	WH1105	MILAN/S-87230//BABAX	Variety	---	---	---	1	---
142	SKW441	RAYON/PASTOR	Improved Genotype	---	---	---	1	---
143	HS542	MILAN/KAUZ,MEX//PRINIA/3/BABAX	Variety	---	---	---	1	---
144	HS595	FRET*2/ELVIRA	Improved Genotype	---	---	---	1	---
145	DBW110	KIRITATI/4/2*SERI-82*2/3/KAUZ*2/BOBWHITE//KAUZ	Variety	---	---	---	3	---
146	HW5216	PBW343//HW3083	Variety	---	---	---	3	---
147	VL3004	HD2844/PBW486	Improved Genotype	---	---	---	1	---
148	GW455	J429/DL790-1//PBW510	Improved Genotype	---	---	---	3	---
149	UAS356	UAS316/K9644//NI5439	Improved Genotype	---	---	---	1	---
150	PBW692	INQUALAB91*3/TUKURU//DBW18	Improved Genotype	---	---	---	1	---
151	DBW52	CAL/NH/H567.71/3/SERI/4/CAL/NH/H567.71/5/2*KAUZ/6/PASTOR	Improved Genotype	---	---	---	1	---
152	HI1531	HI 1182/CPAN 1990	Variety	2005	CZ	---	2	---
153	K1114	HP1731/HUW234	Improved Genotype	---	---	---	1	---
154	WH1129	CS/TH.CS//3*PVN/3/MIRLO/BUC/4/MILAN/5/TILHI	Improved Genotype	---	---	---	1	---
155	PBW596	PBW-343/DHARWAD-DRY//PBW-343	Variety	2008	PZ	---	1	---
156	WH1164	RL6043/4*NAC//2*PASTOR	Improved Genotype	---	---	---	1	---
157	BRW3723	ACHYUT/BL1887	Variety	2017	BIHAR	TS, RF	3	---
158	HD3016	PBW-65/2*PASTOR	Improved Genotype	---	---	---	1	---
159	HD2997	BOBWHITE//HD-2285//HD-2444	Improved Genotype	---	---	---	1	---
160	VL957	RAJ3765/CHINA84-400002	Improved Genotype	---	---	---	3	---
161	DPW621-50	KAUZ//ALTAR-84/(AOS)AWNED-ONAS/3/MILAN/KAUZ/4/HUITES	Variety	---	---	---	1	---
162	WH1142	CHEN/TR.TA//FLYCATCHER/3/2*WEAVER	Variety	---	---	---	1	---
163	PBW373	ND/VG9144 //KAL/BB/3/YCO”S’/4/VEE#5 'S’	Variety	1996	NWPZ	LS, IR	3	---
164	PBW590	WH 594/RAJ3814//W 485	Variety	2008	NWPZ	LS, IR	1	---
165	KRL238	HW-3014/WR-765	Improved Genotype	---	---	---	1	---
166	UAS358	JNRB.5/PFID//RAJ4037	Improved Genotype	---	---	---	1	---
167	HPW370	Milan/S.87230//BABAX	Improved Genotype	---	---	---	3	---
168	GW451	GW324/4/CROC_1/AE.SQUARROSA(205)//JUP/JY/3/SKAUZ/4/KAUZ/5/GW339	Variety	---	---	---	3	---
169	PBW396	CIANO-67/(MFD)MARIS-FUNDIN//MONCHO(SIB)/3/SERI-82	Variety	2000	NWPZ	---	1	---
170	HD3139	WBLL1//UP2338*2/VIVITSI	Improved Genotype	---	---	---	1	---
171	NIAW1994	NIAW 34/ PBW 435	Variety	---	---	---	1	---
172	VL956	VL 832/ ZANDER 33	Improved Genotype	---	---	---	3	---
173	HD3127	PBW343/CHOIX/Star/3/HEI/3*CNO79//2*SERI	Improved Genotype	---	---	---	3	---
174	PBW697	DBW18/3WL711-AE. OVATA/CS(S)//WL711NN/4/DBW18	Improved Genotype	---	---	---	1	---
175	WH1097	ATILLIA/BABAX//PASTOR	Improved Genotype	---	---	---	1	---
176	HPW371	KIRTATI//HUW234+lr34/PRINA	Improved Genotype	---	---	---	1	---
177	PBW702	PBW533//YR15/6*AVOCET/3/PBW533	Improved Genotype	---	---	---	1	---
178	HUW677	HUW510/NW1012//HD2189	Improved Genotype	---	---	---	3	---
179	DBW46	PBW 343/INQ 21	Genetic Stock	---	---	---	3	---
180	DBW51	SITELLA/MILAN	Genetic Stock	---	---	---	3	---
181	PBW703	BW9250*3/YR10/6*AVOCET/3/BW9250*3//YR15/6*AVOCET	Genetic Stock	---	---	---	1	---
182	MP3336	HD 2402/GW 173	Variety	---	---	---	3	---
183	WH1138	PBW65*2/PASTOR	Improved Genotype	---	---	---	1	---
184	UP2855	PBW565/UP2565	Improved Genotype	---	---	---	1	---
185	UAS304	SERI/CEP80120//KAUZ/PBW343	Variety	---	---	---	3	---
186	VL1004	RAJ3765/BLUEBOYII/RAJ3765	Improved Genotype	---	---	---	1	---
187	MP1279	GW322/HW2451	Improved Genotype	---	---	---	2	---
188	HPW361	WW10*WW24	Improved Genotype	---	---	---	1	---
189	HD4730	ALTAR84/STINT//SILVER45	Improved Genotype	---	---	---	3	---
190	WH1156	TILHI/PASTOR	Improved Genotype	---	---	---	1	---
191	K1215	UP2338/CPAN3004	Improved Genotype	---	---	---	1	---
192	HUW666	HUW206/ALTAR84//VEE/MILAN	Improved Genotype	---	---	---	1	---
193	DBW98	PBW65*2/PASTOR//PBW550	Improved Genotype	---	---	---	1	---
194	PBW658	CHINESE-SPRING/TH.SC//3*PAVON-76/3/MIRLO/BUCKBUCK/4/MILAN/5/TILHI	Variety	---	---	---	1	---
195	HS591	HS469/DL460	Improved Genotype	---	---	---	1	---
196	K1204	K8464/PBW343	Improved Genotype	---	---	---	1	---
197	NW4035	WEAWER/WL-2926//SW-89-3064	Improved Genotype	---	---	---	3	---
198	LOK1	S308 / S331	Variety	1982	CZ	TS/LS, IR	3	---
199	UP2864	PBW573/UP2425	Improved Genotype	---	---	---	1	---
200	DBW128	SITE/MO//PASTOR/3/TILHI	Improved Genotype	---	---	---	1	---
201	VL967	SHARP/3/PRL/SARA/TSI/VEE#5/5/VEE/LIRA//BOW/3/BCN/4/KAUZ#4	Improved Genotype	---	---	---	1	---
202	MP4010	ANGOSTURA 88	Variety	2003	CZ	---	3	---
203	DBW88	KAUZ//ALTAR-84/AWNED-ONAS/3/MILAN/KAUZ,MEX/4/HUITES	Variety	---	---	---	1	---
204	HD3086	DBW-14/HD-2733//HUW-468	Variety	---	---	---	1	---
205	FLW5	UP 2338/ ARKAN	Genetic Stock	---	---	---	3	resistance to brown and black rust
206	PBW138	WG-387/HD-2177	Variety	1987	PUNJAB	---	2	---
207	IC321869	SK 24,KACCHI PISSI FROM BHITARWAR,MP	Indigenous Collection	---	---	---	2	---
208	IC321997A	SK 152,AWNLESS LOCAL WHEAT FROM CHAMBA	Indigenous Collection	---	---	---	2	---
209	MP4106	CHIBIA//PRL11/CM65531	Variety	2010	Madhya Pradesh	LS, IR	3	---
210	D134	RS31/WIS245'S'	Variety	1974	CZ	---	2	---
211	FLW30	PBW343/Yr15//PBW34/LR28	Genetic Stock	---	---	---	3	resistance to yellow rust
212	LGM87	LOCAL COLL.GUJARAT	Indigenous Collection	---	---	---	2	---
213	IC212161	COLLECTED FROM JAMNAGAR	Indigenous Collection	---	---	---	3	---
214	DBW50	KAUZ//ALTAR84/AOS/3/MILAN/KAUZ/4/HUITES	Variety	2011	NWPZ	TS, IR	1	---
215	IC321937	SK 92,TALL LOCAL CULTIVAR FROM SHIVPURI,MP	Landraces	---	---	---	2	---
216	K8962	K 7401 /HD 2160	Variety	1996	NEPZ	---	3	---
217	LGM139	LOCAL COLL.GUJARAT	Indigenous Collection	---	---	---	2	---
218	RAJ4037	DL 788-2/RAJ 3717	Variety	2003	CZ	---	3	---
219	IC321905A	SK 60,OLD CULTIVAR FROM GUNA,MP	Indigenous Collection	---	---	---	2	---
220	IC212162	COLLECTED FROM JAMNAGAR	Indigenous Collection	---	---	---	3	---
221	IC321910	SK 65,SHARBATI LOCAL FROM AJGAH	Indigenous Collection	---	---	---	3	---
222	LGM124	LOCAL COLL.GUJARAT	Indigenous Collection	---	---	---	2	---
223	IC212145	COLLECTED FROM JALOR	Indigenous Collection	---	---	---	2	---
224	PBW629	CHIL/ALD//JUP/COC/3/PVN/4/GEN/5/KAUZ/CHO//BUC	Improved Genotype	---	---	---	1	---
225	GL11	LOCAL COLL.GUJARAT	Indigenous Collection	---	---	---	2	---
226	RAJ3765	HD 2402/VL639	Variety	1996	NW/NEPZ	---	3	---
227	FKW1	UP2338*4/CHINA84-40022	Genetic Stock	---	---	---	1	resistance to yellow and black rust
228	VL798	CPAN-3004/CPAN-1922/PBW-65	Genetic Stock	---	---	---	1	hill bunt resistant
229	PBW550	WH-594/RAJ-3858//W-485	Variety	2007	NWPZ	---	1	---
230	PBW579	W7554/PBW427	Improved Genotype	---	---	---	3	---
231	IC321849	SK 4,LOCAL COLL.FROM RAISEN, MP	Indigenous Collection	---	---	---	2	---
232	Agralocal	Local landrace	Indigenous Collection	---	---	---	2	---
233	IC212153AMB	COLLECTED FROM RAJKOT	Indigenous Collection	---	---	---	3	---
234	IC321918	SK 73,OLD CULTIVAR FROM SHIVPURI,MP	Indigenous Collection	---	---	---	2	---
235	IC321984	SK 139,BOLD GRAIN OLD VAR. FROM TEHRI.UTTRANCHAL	Landraces	---	---	---	3	---
236	UP2691	UP2377/HW1085	Improved Genotype	---	---	---	1	---
237	ML1194	BB-ND/NO 66-P1+C81	Genetic Stock	---	---	---	3	resistant to loose smut ,Karnal Bunt, Stripe and leaf rust
238	HD2385	HI 687/HD 2268	Improved Genotype	1987	---	---	3	---
239	LGM205	LOCAL COLL.GUJARAT	Indigenous Collection	---	---	---	2	---
240	T808	Local Landrace	Indigenous Collection	---	---	---	1	---
241	HI977	GALLO/AUST-II-61-157//CIANO-67/NOROESTE-66/3/YAQUI-50-ENANO/3*KALYANSONA	Variety	1988	PZ	---	3	---
242	IC321931	SK 86,LAL PISSI FROM ,GUNA,MP	Indigenous Collection	---	---	---	3	---
243	HD2402	HD2177//CNO67/BB/3/HD2160/4/HD2236	Variety	1988	NEPZ	---	3	---
244	WL3526	HD2009/WG 377	Genetic Stock	---	---	---	3	loose smut ,Karnal Bunt, Stripe leaf resistant
245	K9351	K72/K8027//K72	Variety	2004	Uttar Pradesh	---	1	---
246	VL802	CPAN3018/CPAN3004//PBW65	Variety	---	---	---	1	---
247	WH542	JUPATECO-73/BLUEJAY//URES-81	Variety	1992	NWPZ	---	1	---
248	LGM19	LOCAL COLL.GUJARAT	Indigenous Collection	---	---	---	2	---
249	IC321886	SK 41, LOCAL COLL. FROM BHOPAL,MP	Indigenous Collection	---	---	---	3	---
250	NARMADA4	GB-AVS/N14/3/PW5//TH/NP165	Variety	1971	Madhya Pradesh	---	2	---
251	WH147	E 4870/C286/C273 /4/S339/PV18	Variety	1978	CZ	---	3	salt tolerant
252	NB29424	---	Landraces	---	---	---	2	---
253	HD1981	E 5557 /HD 845	Variety	1978	NWPZ	---	1	---
254	LGM55	LOCAL COLL.GUJARAT	Indigenous Collection	---	---	---	2	---
255	IC321851	SK 6,DESI GEHUN FROM GUNA, MP	Indigenous Collection	---	---	---	3	---
256	L25(RED)	LOCALCOLL.LAHAUL/SPITI	Indigenous Collection	---	---	---	2	---
257	IC321898	SK 53,BLACK AWNED PISSI FROM SHIVPURI,MP	Indigenous Collection	---	---	---	2	---
258	K8020	KALYANSONA/HD 1982	Variety	1987	NEPZ	---	3	---
259	Lok54	LOK1/J.24/SONALIKA"S"//HW2006/RW2358/HW2002	Improved Genotype	---	---	---	3	---
260	K307	K 8321/UP 2003	Variety	2006	NEPZ	---	3	---
261	WH1046	VEERY/PAJONAL//2*HUITLE/3/WH-756	Improved Genotype	---	---	---	1	---
262	NB291359	LOCAL COLL.GUJARAT	Indigenous Collection	---	---	---	2	---
263	LGM225R	LOCAL COLL.GUJARAT	Indigenous Collection	---	---	---	2	---
264	IC212176B	COLLECTED FROM BHAVNAGAR	Indigenous Collection	---	---	---	3	---
265	HD2733	ATTILA /3/ TUI /CARC // CHEN / CHTO /4/ ATTILA	Variety	2001	NEPZ	TS, IR	3	---
266	NB296212	LOCAL COLL.GUJARAT	Indigenous Collection	---	---	---	2	---
267	KRL19	PBW255/KRL 1-4	Variety	2000	ALL ZONES	---	3	Salt Tolerant collection
268	Bacanora88	JUP/BJY//URES	Landraces	---	---	---	1	---
269	HUW206	KAVKAZ/(SIB)BUHO//KALYANSONA/BLUEBIRD	Variety	1985	NEPZ	---	3	---
270	HD2329	HD 1962/E 4870/3/K 65/5/HD1553/4/UP262	Variety	1985	NWPZ	---	1	---
271	UAS316	PASTOR/DHARWAD DRY/DWR39	Improved Genotype	---	---	---	3	---
272	IC212142	COLLECTED FROM BARMER	Indigenous Collection	---	---	---	1	---
273	RAJ4083	PBW-343/UP-2442//WR-258/UP-2425	Variety	2006	PZ	---	2	---
274	LGM132	LOCAL COLL.GUJARAT	Indigenous Collection	---	---	---	1	---
275	IC321885	SK 10,LOCAL COLL.FROM SIRSA, GWALIOR,MP	Indigenous Collection	---	---	---	2	---
276	DBW31	DBW14/PBW343	Genetic Stock	---	---	---	2	---
277	IC321927	SK 82DESI PISSI FROM GUNA,MP	Indigenous Collection	---	---	---	3	---
278	HUW468	CPAN-1962 / TONI // LIRA's’ / PRL's'	Variety	1999	NEPZ	TS, IR	2	---
279	HTW-6	Heat Tolerant Stock	Genetic Stock	---	---	---	3	Heat TolerantStock
280	IC212184	COLLECTED FROM PALI	Indigenous Collection	---	---	---	2	---
281	LGM137	LOCAL COLL.GUJARAT	Indigenous Collection	---	---	---	2	---
282	FLW3	UP 2338/ China 84-40022	Genetic Stock	---	---	---	2	resistance to yellow and black rust
283	AKW28621	VEERI-6//DOVE(SIB)/(SIB)BUCKBUCK	Genetic Stock	---	---	---	3	early and late heat tolerance
284	DBW17	CMH-79-A-95/3*CIANO-79//RAJ-3777	Variety	2006	NWPZ	---	1	terminal heat tolerance
285	HS342	---	Improved Genotype	---	---	---	1	---
286	Lok44	---	Improved Genotype	---	---	---	3	---
287	HS375	BB/G 11/CJ 71/3/TA EST//KAL/BB	Variety	2002	NHZ	SUMMER SOWING	3	---
288	IC321998	SK 153,PAHARI LOCAL FROM GOPESHWAR,	Indigenous Collection	---	---	---	3	---
289	LGM79	LOCAL COLL.GUJARAT	Indigenous Collection	---	---	---	3	---
290	K9006	CPAN 1687 /HD 2204	Variety	1998	Uttar Pradesh	---	3	Karnal Bunt Tolerant
291	FLW11	WH 542*/Hobbit	Genetic Stock	---	---	---	2	multiple rust resistance
292	UP2425	HD 2320/UP 2263	Variety	1999	NWPZ	---	3	---
293	IC321988	SK 143,CHURI GEHUN FROM JOSHIMATH,UTTARANCHAL	Indigenous Collection	---	---	---	3	---
294	UAS305	CMH-84-3379/CMH-78-578//MILAN/HD-2189	Improved Genotype	---	---	---	3	---
295	VL900	KAUZ/3/MYNA/BUL/FLK/4/MILAN	Improved Genotype	---	---	---	2	---
296	LGM2251	LOCAL COLL.GUJARAT	Indigenous Collection	---	---	---	1	---
297	SG15	UP 368-SHAILZA//WH 157-Bulk 1858/GP 104	Genetic Stock	---	---	---	3	---
298	LGM191	LOCAL COLL.GUJARAT	Indigenous Collection	---	---	---	2	---
299	PBW65	USA 255/K 816 /3/ WL 202	Variety	1984	NWPZ	---	3	---
300	HS514	INQUALAB*2/TUKURU	Improved Genotype	---	---	---	2	---
301	WL711	SONALIKA/CHRIS//KALYANSONA	Variety	1977	NWPZ	---	3	---
302	LGM114	LOCAL COLL.GUJARAT	Indigenous Collection	---	---	---	3	---
303	HD2285	249/HD-2160//HD-2186	Variety	1984	NWPZ	---	1	Karnal Bunt Tolerant
304	IC322023	SK 178, IMPROVED WHEAT FROM CHAMBA	Indigenous Collection	---	---	---	3	---
305	IC212190	COLLECTED FROM JODHPUR	Indigenous Collection	---	---	---	3	---
306	VL616	SONALIKA/CPAN 1507	Variety	1986	NHZ	ES, RF	3	---
307	HD2270	HD 1962/E4870/ K65/HD 2119 /247	Variety	1988	NWPZ	---	2	---
308	HUW234	HUW 12* 2 / CPAN 1666// HUW 12	Variety	1986	NEPZ	LS, IR	2	---
309	LGM134B	LOCAL COLL.GUJARAT	Indigenous Collection	---	---	---	3	---
310	GW366	DL802-3/GW232	Variety	2006	CZ	---	3	---
311	DL12665	SFW/VAISHALI	Genetic Stock	---	---	---	2	---
312	SONALIKA	II-53-388/ANDES//(SIB)PITIC-62/3/LERMA-ROJO-64	Variety	1969	NW/NEPZ	---	3	Salt Tolerant
313	Kharchia Local	Salt Tolerant collection	Indigenous Collection	---	---	---	3	Salt Tolerant collection
314	IC212151	COLLECTED FROM BANASKANTHA	Indigenous Collection	---	---	---	3	---
315	IC321946	SK 101,DWARF WHEAT FROM MORAGAON,ASSAM	Landraces	---	---	---	2	---
316	Halna	Heat Tolerant Stock	Variety	---	---	---	2	Heat TolerantStock
317	WBM1587	MILAN/SHA7	Genetic Stock	---	---	---	1	yellow rust resistant
318	IC321856	SK 11,PISSILOCAL FROM GUNA,MP	Indigenous Collection	---	---	---	3	---
319	AKW1071	VEE'S'/ 3FLN/ACC// ANA	Variety	1995	CZ	---	1	Heat Tolerant Stock
320	LGM162	LOCAL COLL.GUJARAT	Indigenous Collection	---	---	---	2	---
321	IC321951	SK 106,OLD DURUM VAR. FROM SHILLOGNI,ASSAM	Indigenous Collection	---	---	---	1	---
322	DBP0116	HD 4502///T.turgidum 46432//RAJ 911/3/T.turgidum 44	Genetic Stock	---	---	---	2	---
323	HD2824	PTO-1 / CNO 79 / PRL /GAA /3/HD 1951	Variety	2003	NEPZ	TS, IR	3	---
324	HS295	CINQUENTENARIO/AZTECA-67//IAS-55/ALONDRA/3/ALONDRA/NAOFEN/4/PAJONAL/PEL-1276.69	Variety	1992	NHZ	LS, RF/LIR	3	---
325	LGM130	LOCAL COLL.GUJARAT	Indigenous Collection	---	---	---	1	---
326	PBW610	W 13334/IBWSN 92//PBW 496	Improved Genotype	---	---	---	1	---
327	Hindi62	PBW-226/HW-1042//HD-2285	Genetic Stock	---	---	---	2	Heat and Drought Tolerant
328	HI1500	HW 2002*2//STREMPALLI/PNC 5	Variety	2003	CZ	---	1	---
329	LGM69	LOCAL COLL.GUJARAT	Indigenous Collection	---	---	---	2	---
330	GW391	C-306/TR.SH//HW-2004	Improved Genotype	---	---	---	2	---
331	BWL9022	---	Improved Genotype	---	---	---	2	---
332	IC322016	SK 171, LOCAL WHEAT FROM JOSHIMATH	Indigenous Collection	---	---	---	3	---
333	RD20	PBW 34/DCB 25	Genetic Stock	---	---	---	1	---
334	MP3211	SUPER-KAUZ/FLYCATCHER	Variety	---	---	---	3	---
335	MP1202	CMH-82-A-1294/2*KAUZ//MUNIA/CHORLITO/3/MILAN	Variety	---	---	---	3	---
336	IC321866	SK 21,BROWN SPIKE LOCAL WHEAT,RAISEN,MPP	Indigenous Collection	---	---	---	1	---
337	TANK	local land race	Indigenous Collection	---	---	---	1	---
338	NI5439	RFPM-80/3*NP-710	Variety	1973	PZ	---	3	---
339	UP115	NP-887/E-4870//UP-302	Variety	1980	NEPZ	---	2	---
340	BAGESHWARLOCAL	LOCAL COLL. UPHILLS	Indigenous Collection	---	---	---	2	---
341	IC321892	SK 47,SUJATA FROM ROCKY SOIL ,RAJGARH,MP	Indigenous Collection	---	---	---	3	---
342	GW273	CPAN-2084/VW-205	Variety	1998	CZ	---	2	---
343	HD2888	C 306/T.sphaerococcum//HW 2004	Variety	2005	NEPZ	---	3	---
344	HUW598	WH581/HUW395//RAJ3765	Improved Genotype	---	---	---	1	---
345	IC296440	---	Indigenous Collection	---	---	---	2	---
346	WBM1591	PYN/BAU//MILAN	Genetic Stock	---	---	---	1	yellow rust resistant
347	GL34	LOCAL COLL.GUJARAT	Indigenous Collection	---	---	---	3	---
348	RAJ4124	BUCK-PANGARE(SIB)//CIANO-67(SIB)/GALLO/HD-30//VL-804	Improved Genotype	---	---	---	2	---
349	HI1544	HINDI 62/BOBWHITE/CPAN 2099	Variety	2007	CZ	---	2	---
350	WH595	PRL 6045/NAC 76	Genetic Stock	---	---	---	3	stripe rust resistant
351	IC321888	SK 43,DROUGHT TOLERANT LOCAL FROM GUNA,MP	Indigenous Collection	---	---	---	3	DROUGHT TOLERANT LOCAL
352	SONORA64	YAKTANA-54//NORIN-10/BREVOR/3/2*YAQUI-54	Variety	1965	NEPZ/CZ	---	3	---
353	IC321922	SK 77,OLD CULTIVAR FROM ,MP	Indigenous Collection	---	---	---	3	---
354	HD2967	ALONDRA/CUCKOO//URES-81/HD-2160-M/HD-2278	Variety	---	---	---	3	---
355	girgehnu	---	Indigenous Collection	---	---	---	1	---
356	LGM112	LOCAL COLL.GUJARAT	Indigenous Collection	---	---	---	1	---
357	Sel111	CHINESE-SPRING-monosomic-5B/(SE.CE)RUSSIAN-RYE/C-591//SONALIKA	Genetic Stock	---	---	---	2	---
358	IC321877	SK 32,RED GRAIN DESI GEHUN FROM GUNA,MP	Indigenous Collection	---	---	---	3	---
359	DBW16	RAJ 3765/WR 484//HUW 468	Variety	2006	NEPZ	---	3	---
360	GL39	LOCAL COLL.GUJARAT	Indigenous Collection	---	---	---	2	---
361	DI717	C306 M10/Tordo S	Genetic Stock	---	---	---	1	---
362	LBRL4	BREEDSEL-172/PC-OE-BW-22	Genetic Stock	---	---	---	2	leaf blight resistant
363	NW2036	BOBWHITE/CROW/BUCKBUCK/PAVON-76	Variety	2002	NEPZ	---	3	---
364	CBW38	CNDO/R 143/ENTE/MEXI_2/3/Ae.SQUARROSA (TAUS)/4/WEAVER/5/2*PASTOR	Variety	---	---	---	1	---
365	KBRL22	HD29 / W485	Genetic Stock	---	---	---	1	Karnal Bunt Tolerant
366	IC321950	SK 105,IMPROVED VAR. FROM DOLOIGAON,ASSAM	Landraces	---	---	---	1	---
367	HP1633	RL 6010 / 5* SKA	Variety	1992	NEPZ	LS, IR	3	---
368	HD30	HD-2160/HD-1977//HD-7949/HD-1944/HD-2136	Genetic Stock	---	---	---	1	Karnal Bunt resistant
369	L2(Ad)	LOCALCOLL.LAHAUL/SPITI	Indigenous Collection	---	---	---	3	---
370	IC212140	COLLECTED FROM BARMER	Indigenous Collection	---	---	---	2	---
371	Chirya3	CS/AG.CU//GLEN/3/ALD/PVN/4/NINGMAI NO.4/OLESON//ALD/YANGMAI NO.4	Landraces	---	---	---	3	---
372	HPW147	CPAN-1869/HIM-10-BA	Variety	1999	Himachal Pradesh	---	1	---
373	HD2687	CPAN-2009/HD-2329	Variety	1999	NWPZ	---	3	---
374	HD3043	PAJONAL/BOBWHITE//OPATA-85*2/3/CROC-1/TR.TA(224)//OPATA-85	Variety	---	---	---	2	---
375	WL3093	USA 251/WL223//WG377	Improved Genotype	---	---	---	1	loose smut ,Karnal Bunt, Stripe leaf resistant
376	DL7882	K7537/HD2160/ HD2278//L24/K4.14	Variety	1997	CZ	---	3	---
377	LGM110	LOCAL COLL.GUJARAT	Indigenous Collection	---	---	---	3	---
378	IC212182	COLLECTED FROM SIROHI	Indigenous Collection	---	---	---	2	---
379	GHATVIDHARVALOCAL1	LOCAL COLL.GUJARAT	Indigenous Collection	---	---	---	2	---
380	SAFEDLERMA	Y50//N10B/3/LR 52/3*LR	Variety	1969	NPZ	---	3	---
381	VL907	DYBR-1982-83/842-ABVD-50/VW-9365//PBW-343	Variety	2010	NEPZ	---	3	---
382	WH1080	21STSAWSN151	Variety	2011	NWPZ	TS, RF	1	---
383	VL738	NS12.07 /LIRA”S” //VEE ‘S”	Variety	1997	NHZ	---	1	---
384	HW2049	HD-2285*6//SUNSTAR*6/C-80-1	Genetic Stock	---	---	---	1	resistance to brown and black rust
385	PBW502	W-485/PBW-343//RAJ-148	Variety	2004	NWPZ	---	3	resistant to Karnal Bunt
386	HUW616	RAJ-3814/WH-283//HD-2402	Improved Genotype	---	---	---	1	---
387	HD2932	KAUZ/STAR//HD 2643	Variety	2007	CZ&PZ	---	1	---
388	IC321958	SK 113,DESI WHEAT FROM RAIBENGIA VILL.,ASSAM	Indigenous Collection	---	---	---	2	---
389	UP2338	UP 368 /VL 421//UP 262	Variety	1995	NWPZ	TS/LS, IR	3	---
390	WL5634	KAVKAZ-CNO-INIA/WL903	Genetic Stock	---	---	---	3	loose smut ,Karnal Bunt, Stripe leaf resistant
391	RAJ4356	---	Improved Genotype	---	---	---	3	---
392	L17A	LOCALCOLL.LAHAUL/SPITI	Indigenous Collection	---	---	---	2	---
393	L25(AMB)	LOCALCOLL.LAHAUL/SPITI	Indigenous Collection	---	---	---	2	---
394	HD2189	HD1963/HD1931	Variety	1980	PZ	---	2	---
395	HD2009	LERMA-ROJO-64-A/NAINARI-60	Variety	1975	NWPZ	---	3	---
396	PWR4099	CBHW-CHN-89-R-4294O-CHN-S-2BV-97-(EC-4141480)	Genetic Stock	---	---	---	1	---
397	IC322011A	SK 166, DESI WHEAT FROM JOSHIMATH	Indigenous Collection	---	---	---	2	---
398	IC321847	SK 2,PRIMITIVE CULTIVAR FROM GUNA,MP	Indigenous Collection	---	---	---	2	---
399	UAS320	UAS-257//GW-322/DWR-195	Genetic Stock	---	---	---	1	---
400	LGM238	LOCAL COLL.GUJARAT	Indigenous Collection	---	---	---	2	---
401	PBW644	PBW-175/HD-2643	Variety	---	---	---	1	---
402	HD3059	KAUZ//ALTAR-84/(AOS)AWNED-ONAS/3/MILAN/KAUZ/4/HUITE	Variety	---	---	---	1	---
Zone a
NEPZ= Northern East Plain Zone
PZ= Peninsular Zone
CZ= Central Zone
NWPZ= Northern West Plain Zone
NHZ= Northern Hill Zone
Season Type b
TS= Timely Sown
IR= Irrigated
LS= Late Sown
RF= Rain Fed
ES= Early Sown
LIR= late IR
