# Supplementary material for: Uncovering Genomic Regions Associated With 36 Agro-Morphological Traits in Indian Spring Wheat Using GWAS
Source: Front Plant Sci. 2019 Apr 25;10:527. doi: 10.3389/fpls.2019.00527 (PMC6511880; doi:10.3389/fpls.2019.00527)
Supplement: Supplementary file 11 [file Table_5.xlsx]

## Sheet: Correlations
Additional Table S5: Correlations among 35 agro-morphological traits
	C_Col	PGH	Aur_Col	Aur_Pub	Leaf_Att	Fol_Col	DTH	PH	SL	Awn_L	Leaf_L	Leaf_Br	Ped_Att	Wax_Ear	Wax_LS	Wax_LB	Wax_Ped	Glu_Pub	Sh_Wid	Shl_Sh	Beak_L	Beak_Sh	Ear _Col	Ear _S	Ear_D	Awn_Col	Awn_Att	Grn_Col	Grn_Sh	Brush_L	Grn_ Size	Grn_Tex	Germ_Wid	Awn_P	Grn_Ph
C_Col	1	-0.24636***	-0.09427	-0.08827	0.06087	-0.17936**	0.06147	0.31327 ***	-0.11456*	-0.08281	-0.09352	-0.13651*	-0.17918**	-0.16557**	-0.21004 ***	-0.04976	-0.19216 ***	-0.06971	-0.14824*	-0.20919 ***	-0.06384	-0.1185	-0.0868	0.04813	0.05835	-0.02986	-0.21523 ***	0.05871	0.03084	-0.09735*	-0.19544 ***	-0.20422 ***	0.16644**	-0.07664	-0.15791**
PGH	-0.24636***	1	0.22161***	0.13415*	-0.14527*	0.13483*	0.06462	-0.23166***	0.15222*	0.15738**	0.06028	0.02373	0.0063	0.21571***	0.11602*	-0.01449	0.20121***	0.09427	0.15907**	0.23112***	0.0343	0.13527*	-0.10157*	-0.16987**	-0.16689**	-0.11484*	0.15369**	-0.00617	-0.16148**	0.00742	0.02166	0.19385 ***	-0.06078	0.1096*	0.18887 ***
Aur_Col	-0.09427	0.22161***	1	0.01992	-0.13043*	0.05698	0.01403	-0.0194	0.06487	0.1559**	-0.04446	-0.11279*	0.00505	-0.01102	-0.12551*	-0.05875	0.01601	0.11892*	0.09232	0.14133*	-0.0116	0.07836	-0.12121*	-0.03542	-0.13815	-0.04907	-0.03062	0.01302	-0.04456	-0.11074*	0.03311	0.00983	-0.10561*	0.05	0.0414
Aur_Pub	-0.08827	0.13415*	0.01992	1	-0.17964**	-0.1191*	0.04631	-0.14092*	0.18788***	-0.07635	0.24049***	0.10627*	-0.07526	0.2224***	0.22915***	0.01738	0.16379**	0.03247	0.00813	0.13163*	0.03987	-0.04771	-0.04089	-0.07324	0.00301	0.05224	0.2319***	0.02825	-0.06683	0.16197**	0.03649	0.06119	-0.07064	0.07549	0.04293
Leaf_Att	0.06087	-0.14527*	-0.13043*	-0.17964**	1	0.00732	-0.07184	0.07899	0.02246	-0.03579	-0.00879	-0.06993	0.09964*	-0.21139***	-0.07136	-0.00331	-0.14972*	-0.08832	-0.08451	-0.10523*	0.00823	0.14028*	0.04478	0.00084	0.10748*	0.07166	-0.00491	-0.07686	0.13135*	0.037	0.02808	-0.10394*	-0.05045	0.01588	-0.07533
Fol_Col	-0.17936**	0.13483*	0.05698	-0.1191*	0.00732	1	-0.0083	-0.14835*	0.00695	0.016	-0.05826	0.04159	0.04633	0.01988	-0.00227	0.09282	0.0565	0.01018	0.16117**	0.06692	-0.01232	0.09105	-0.05037	-0.10382*	-0.07098	-0.1197*	-0.0239	-0.03838	-0.06847	-0.12583*	-0.01071	-0.00029	-0.02387	-0.09652	0.05923
DTH	0.06147	0.06462	0.01403	0.04631	-0.07184	-0.0083	1	0.16132**	0.10716*	-0.0631	0.09895*	0.06894	0.01371	0.12378*	0.07387	0.17547**	0.09448	-0.01319	-0.03319	-0.09237	0.05858	0.00242	-0.03738	-0.01292	0.22886***	0.08097	-0.00579	0.10569*	0.00639	0.15556**	-0.04767	-0.03761	0.08218	0.03307	-0.06378
PH	0.31327***	-0.23166***	-0.0194	-0.14092*	0.07899	-0.14835*	0.16132**	1	-0.15446**	-0.04897	-0.06851	-0.18286**	-0.22307***	-0.25332***	-0.294***	0.01924	-0.21923***	0.10373*	-0.17985**	-0.32607***	-0.15261*	-0.11466*	-0.06403	0.09216	-0.0866	-0.14755*	-0.33814***	0.0286	-0.0323	-0.2768***	-0.09984*	-0.17271**	0.06587	-0.17314**	-0.15386**
SL	-0.11456*	0.15222*	0.06487	0.18788***	0.02246	0.00695	0.10716*	-0.15446**	1	0.01241	0.20778***	0.13588*	0.02639	0.2938***	0.22768***	0.12806*	0.18771***	0.01057	-0.01252	0.14187*	0.00205	0.03124	0.05815	-0.14341*	-0.088	0.10215*	0.25497***	-0.03909	0.03612	0.25456***	0.01774	0.06613	-0.00762	0.02209	0.04907
Awn_L	-0.08281	0.15738**	0.1559**	-0.07635	-0.03579	0.016	-0.0631	-0.04897	0.01241	1	0.07545	0.04511	-0.01944	-0.09489	-0.09986*	-0.21133***	-0.03551	0.13157*	0.09679	0.07081	0.09951*	0.06845	-0.0293	-0.15556**	-0.1894***	0.11055*	0.08286	-0.03404	-0.04181	-0.11552*	0.00924	0.07398	-0.06768	0.30365***	-0.01095
Leaf_L	-0.09352	0.06028	-0.04446	0.24049***	-0.00879	-0.05826	0.09895*	-0.06851	0.20778***	0.07545	1	0.20312***	-0.01844	0.18098**	0.19527***	0.0212	0.07105	0.09837*	0.00147	0.04722	0.12286*	0.04204	0.06126	-0.02896	0.05139	0.14197*	0.21239***	-0.0479	0.01432	0.1229*	0.03277	0.05235	-0.08609	0.13006*	-0.03057
Leaf_Br	-0.13651*	0.02373	-0.11279*	0.10627*	-0.06993	0.04159	0.06894	-0.18286*	0.13588*	0.04511	0.20312***	1	0.06125	0.16947**	0.262***	0.04809	0.09862*	0.0424	0.07508	0.01075	0.06368	-0.10425*	0.1331*	-0.05942	0.1232*	0.18512**	0.12108*	-0.05283	0.00116	0.15125*	0.14158*	0.03307	0.0048	0.09568	0.01933
Ped_Att	-0.17918**	0.0063	0.00505	-0.07526	0.09964*	0.04633	0.01371	-0.22307***	0.02639	-0.01944	-0.01844	0.06125	1	0.02178	0.07204	0.01404	0.01234	0.08255	-0.00141	0.0202	-0.03128	0.16411**	0.05202	-0.04203	0.18367**	0.07808	0.01873	-0.04315	0.09703	0.19215***	0.04928	0.03491	-0.0594	-0.00314	0.06766
Wax_Ear	-0.16557**	0.21571***	-0.01102	0.2224***	-0.21139***	0.01988	0.12378*	-0.25332***	0.2938***	-0.09489	0.18098**	0.16947**	0.02178	1	0.63325***	0.39217***	0.58811***	-0.11871*	0.04081	0.22126***	-0.04026	0.03933	-0.05458	-0.05169	0.13989*	-0.05254	0.15315*	-0.00463	-0.02818	0.22936***	-0.02875	0.01479	-0.02103	-0.0032	0.06306
Wax_LS	-0.21004***	0.11602*	-0.12551*	0.22915***	-0.07136	-0.00227	0.07387	-0.294***	0.22768***	-0.09986*	0.19527***	0.262***	0.07204	0.63325***	1	0.30985***	0.76872***	-0.05472	0.03477	0.13331*	-0.03847	0.03024	0.06036	-0.06926	0.13266*	0.07738	0.17483**	-0.02244	-0.04186	0.2347***	0.06015	0.05699	0.04777	-0.03089	0.12284*
Wax_LB	-0.04976	-0.01449	-0.05875	0.01738	-0.00331	0.09282	0.17547**	0.01924	0.12806*	-0.21133***	0.0212	0.04809	0.01404	0.39217***	0.30985***	1	0.41361***	-0.09464	-0.10297*	0.0006	0.00216	0.09823*	-0.0458	0.08775	0.20142***	-0.06396	-0.05009	-0.04659	-0.04846	0.11522*	-0.02286	-0.09786*	-0.01977	-0.11548*	0.03341
Wax_Ped	-0.19216***	0.20121***	0.01601	0.16379**	-0.14972*	0.0565	0.09448	-0.21923***	0.18771***	-0.03551	0.07105	0.09862*	0.01234	0.58811***	0.76872***	0.41361***	1	-0.01295	0.06336	0.1548**	-0.06577	0.00805	-0.0555	-0.04445	0.05074	-0.05144	0.07149	-0.00208	-0.12174*	0.08687	-0.00559	0.08673	0.02855	-0.04937	0.10089*
Glu_Pub	-0.06971	0.09427	0.11892*	0.03247	-0.08832	0.01018	-0.01319	0.10373*	0.01057	0.13157*	0.09837*	0.0424	0.08255	-0.11871*	-0.05472	-0.09464	-0.01295	1	0.07708	-0.01842	-0.02387	0.04655	-0.08709	0.01942	-0.07659	0.02311	-0.0769	0.01259	0.05317	-0.05589	0.07876	0.14111*	-0.01625	-0.02018	0.02395
Sh_Wid	-0.14824*	0.15907**	0.09232	0.00813	-0.08451	0.16117**	-0.03319	-0.17985**	-0.01252	0.09679	0.00147	0.07508	-0.00141	0.04081	0.03477	-0.10297*	0.06336	0.07708	1	0.32539***	-0.08452	0.04893	-0.10632*	-0.09195	-0.04771	-0.07658	0.0323	-0.00664	-0.10428*	0.03297	0.10713*	0.1231*	-0.04359	-0.02789	0.13677*
Shl_Sh	-0.20919***	0.23112***	0.14133*	0.13163*	-0.10523*	0.06692	-0.09237	-0.32607***	0.14187*	0.07081	0.04722	0.01075	0.0202	0.22126***	0.13331*	0.0006	0.1548**	-0.01842	0.32539***	1	0.09474	0.06105	-0.12785*	-0.13832*	-0.03434	-0.04455	0.24085***	0.00329	-0.06821	0.13763*	0.11926*	0.05951	-0.07646	0.08899	0.14016*
Beak_L	-0.06384	0.0343	-0.0116	0.03987	0.00823	-0.01232	0.05858	-0.15261*	0.00205	0.09951*	0.12286*	0.06368	-0.03128	-0.04026	-0.03847	0.00216	-0.06577	-0.02387	-0.08452	0.09474	1	-0.00635	-0.03408	-0.06984	-0.00441	0.04412	0.19336***	0.06745	-0.06522	0.0895	0.04134	0.00896	-0.04772	0.34256***	0.06466
Beak_Sh	-0.1185*	0.13527*	0.07836	-0.04771	0.14028*	0.09105	0.00242	-0.11466*	0.03124	0.06845	0.04204	-0.10425*	0.16411**	0.03933	0.03024	0.09823*	0.00805	0.04655	0.04893	0.06105	-0.00635	1	-0.00815	-0.01626	0.04859	0.01918	0.00649	-0.02598	0.07869	0.05675	0.08164	0.01324	-0.0679	-0.05844	0.07934
Ear _Col	-0.0868	-0.10157*	-0.12121*	-0.04089	0.04478	-0.05037	-0.03738	-0.06403	0.05815	-0.0293	0.06126	0.1331*	0.05202	-0.05458	0.06036	-0.0458	-0.0555	-0.08709	-0.10632*	-0.12785*	-0.03408	-0.00815	1	-0.03692	0.00571	0.50481***	0.0814	-0.11248*	0.03548	0.07055	0.05213	-0.13789*	0.0604	-0.05822	0.07778
Ear _S	0.04813	-0.16987**	-0.03542	-0.07324	0.00084	-0.10382*	-0.01292	0.09216	-0.14341*	-0.15556**	-0.02896	-0.05942	-0.04203	-0.05169	-0.06926	0.08775	-0.04445	0.01942	-0.09195	-0.13832*	-0.06984	-0.01626	-0.03692	1	0.19179***	-0.12833*	-0.20161***	0.07372	-0.0481	-0.09197	-0.03071	-0.02075	0.0266	-0.09306	-0.14884*
Ear_D	0.05835	-0.16689**	-0.13815*	0.00301	0.10748*	-0.07098	0.22886***	-0.0866	-0.088	-0.1894***	0.05139	0.1232*	0.18367**	0.13989*	0.13266*	0.20142***	0.05074	-0.07659	-0.04771	-0.03434	-0.00441	0.04859	0.00571	0.19179***	1	0.04314	0.05539	0.02901	0.11918*	0.16602**	-0.00935	-0.01883	0.0297	-0.03044	-0.17795**
Awn_Col	-0.02986	-0.11484*	-0.04907	0.05224	0.07166	-0.1197*	0.08097	-0.14755*	0.10215*	0.11055*	0.14197*	0.18512**	0.07808	-0.05254	0.07738	-0.06396	-0.05144	0.02311	-0.07658	-0.04455	0.04412	0.01918	0.50481***	-0.12833*	0.04314	1	0.33249***	-0.14994*	0.10567*	0.19952***	0.12617*	-0.07043	0.04794	0.35643***	0.0027
Awn_Att	-0.21523***	0.15369**	-0.03062	0.2319	-0.00491	-0.0239	-0.00579	-0.33814*	0.25497*	0.08286	0.21239*	0.12108*	0.01873	0.15315*	0.17483**	-0.05009	0.07149	-0.0769	0.0323	0.24085***	0.19336***	0.00649	0.0814	-0.20161***	0.05539	0.33249***	1	-0.0168	0.04729	0.37372***	0.16262**	0.08008	-0.02499	0.5359***	0.04713
Grn_Col	0.05871	-0.00617	0.01302	0.02825	-0.07686	-0.03838	0.10569*	0.0286	-0.03909	-0.03404	-0.0479	-0.05283	-0.04315	-0.00463	-0.02244	-0.04659	-0.00208	0.01259	-0.00664	0.00329	0.06745	-0.02598	-0.11248*	0.07372	0.02901	-0.14994*	-0.0168	1	0.04203	0.09603	-0.05676	0.05065	0.00775	-0.00728	-0.05979
Grn_Sh	0.03084	-0.16148**	-0.04456	-0.06683	0.13135*	-0.06847	0.00639	-0.0323	0.03612	-0.04181	0.01432	0.00116	0.09703	-0.02818	-0.04186	-0.04846	-0.12174*	0.05317	-0.10428*	-0.06821	-0.06522	0.07869	0.03548	-0.0481	0.11918*	0.10567*	0.04729	0.04203	1	0.08884	0.02831	-0.0499	0.08052	0.05749	0.01402
Brush_L	-0.09735*	0.00742	-0.11074*	0.16197**	0.037	-0.12583*	0.15556**	-0.2768***	0.25456***	-0.11552*	0.1229*	0.15125*	0.19215***	0.22936***	0.2347***	0.11522*	0.08687	-0.05589	0.03297	0.13763*	0.0895	0.05675	0.07055	-0.09197	0.16602**	0.19952***	0.37372***	0.09603	0.08884	1	0.11547*	0.03951	0.04606	0.16236**	0.13467*
Grn_ Size	-0.19544***	0.02166	0.03311	0.03649	0.02808	-0.01071	-0.04767	-0.09984*	0.01774	0.00924	0.03277	0.14158*	0.04928	-0.02875	0.06015	-0.02286	-0.00559	0.07876	0.10713*	0.11926*	0.04134	0.08164	0.05213	-0.03071	-0.00935	0.12617*	0.16262**	-0.05676	0.02831	0.11547*	1	0.08925	-0.06692	0.09844*	0.10519*
Grn_Tex	-0.20422***	0.19385***	0.00983	0.06119	-0.10394*	-0.00029	-0.03761	-0.17271**	0.06613	0.07398	0.05235	0.03307	0.03491	0.01479	0.05699	-0.09786*	0.08673	0.14111*	0.1231*	0.05951	0.00896	0.01324	-0.13789*	-0.02075	-0.01883	-0.07043	0.08008	0.05065	-0.0499	0.03951	0.08925	1	-0.07654	-0.00497	-0.00976
Germ_Wid	0.16644**	-0.06078	-0.10561*	-0.07064	-0.05045	-0.02387	0.08218	0.06587	-0.00762	-0.06768	-0.08609	0.0048	-0.0594	-0.02103	0.04777	-0.01977	0.02855	-0.01625	-0.04359	-0.07646	-0.04772	-0.0679	0.0604	0.0266	0.0297	0.04794	-0.02499	0.00775	0.08052	0.04606	-0.06692	-0.07654	1	-0.09317	-0.00522
Awn_P	-0.07664	0.1096*	0.05	0.07549	0.01588	-0.09652	0.03307	-0.17314**	0.02209	0.30365***	0.13006*	0.09568	-0.00314	-0.0032	-0.03089	-0.11548*	-0.04937	-0.02018	-0.02789	0.08899	0.34256***	-0.05844	-0.05822	-0.09306	-0.03044	0.35643***	0.5359***	-0.00728	0.05749	0.16236**	0.09844*	-0.00497	-0.09317	1	-9e-05
Grn_Ph	-0.15791**	0.18887***	0.0414	0.04293	-0.07533	0.05923	-0.06378	-0.15386**	0.04907	-0.01095	-0.03057	0.01933	0.06766	0.06306	0.12284*	0.03341	0.10089*	0.02395	0.13677*	0.14016*	0.06466	0.07934	0.07778	-0.14884*	-0.17795**	0.0027	0.04713	-0.05979	0.01402	0.13467*	0.10519*	-0.00976	-0.00522	-9e-05	1
*** , p< 0.0001
**, p< 0.001
*, p< 0.05
