# Supplementary material for: Uncovering Genomic Regions Associated With 36 Agro-Morphological Traits in Indian Spring Wheat Using GWAS
Source: Front Plant Sci. 2019 Apr 25;10:527. doi: 10.3389/fpls.2019.00527 (PMC6511880; doi:10.3389/fpls.2019.00527)
Supplement: Supplementary file 12 [file Table_6.xlsx]

## Sheet: Basic Stats
Additional Table S6: Basic statistical analysis of SNP markers used for genome-wide association study (GWAS) of 402 wheat genotypes
Chra	No. of markers	Position b	Density(cM/marker)		Diversity			PICc
		(cM)			Mean	Range		Mean	Range
1A	828	107.03	0.129263		0.3509	0.0874-0.5000		0.2813	0.0836-0.3750
2A	1070	179.98	0.168206		0.3638	0.0946-0.5000		0.2914	0.0901-0.3750
3A	725	337.65	0.465724		0.3594	0.0943-0.5000		0.2876	0.2195-0.3626
4A	583	204.35	0.350515		0.3423	0.0862-0.5000		0.2758	0.0824-0.3750
5A	850	114.75	0.135		0.3618	0.0943-0.5000		0.2898	0.0899-0.3750
6A	638	224.94	0.352571		0.3613	0.0955-0.5000		0.2879	0.0909-0.3750
7A	828	185.83	0.224432		0.3614	0.0946-0.5000		0.2889	0.0901-0.3750
1B	1183	148.05	0.125148		0.3667	0.0950-0.5000		0.2935	0.0905-0.3750
2B	1324	186.53	0.140884		0.3624	0.0940-0.5000		0.2897	0.0901-0.3750
3B	1191	244.78	0.205525		0.3803	0.0909-0.5000		0.3005	0.0868-0.3750
4B	419	146.5	0.349642		0.3623	0.0988-0.5000		0.265	0.0939-0.3750
5B	1235	324.74	0.262947		0.393	0.0920-0.5000		0.3091	0.0878-0.3750
6B	1114	159.57	0.143241		0.3706	0.0950-0.5000		0.2942	0.0905-0.3750
7B	741	335.75	0.453104		0.3674	0.0911-0.5000		0.2918	0.0870-0.3750
1D	381	236.45	0.620604		0.3894	0.1074-0.5000		0.3057	0.1016-0.3750
2D	352	280.14	0.795852		0.332	0.1004-0.5000		0.2696	0.0954-0.3750
3D	205	203.31	0.991756		0.3558	0.0955-0.4999		0.2838	0.0909-0.3750
4D	55	113.23	2.05873		0.3659	0.1021-0.5000		0.2882	0.0969-0.3750
5D	181	217.99	1.20436		0.256	0.0950-0.4998		0.2184	0.0905-0.3749
6D	122	173.75	1.42418		0.3613	0.1000-0.5000		0.2895	0.0950-0.3750
7D	135	239.47	1.77385		0.3514	0.0870-0.4995		0.2818	0.0832-0.3747
A genome	5522	1354.53	0.245297		0.358059	0.0862-0.5000		0.286719	0.0824-0.3750
B genome	7207	1545.92	0.214503		0.370988	0.0909-0.5000		0.294929	0.0868-0.3750
D genome	1431	1464.34	1.0233		0.346716	0.0870-0.5000		0.278327	0.0832-0.3750
aChr, Chromosome.
bThe physical map based on wheat genome sequences from the International Wheat Genome Sequencing Consortium (IWGSC, http://www.wheatgenome.org/).
c PIC, Polymorphism information content.
