# Supplementary material for: Uncovering Genomic Regions Associated With 36 Agro-Morphological Traits in Indian Spring Wheat Using GWAS
Source: Front Plant Sci. 2019 Apr 25;10:527. doi: 10.3389/fpls.2019.00527 (PMC6511880; doi:10.3389/fpls.2019.00527)
Supplement: Supplementary file 13 [file Table_7.xlsx]

## Sheet: Table S7
Additional Table S7 : Significant marker loci associated with 17 agro-morphological traits
Traits	SNP marker	Chromosome	Position (cM)	P-value	Effect	R2	Physical position (Mb)	Chromosome (IWGSC)
C_Col	AX-94962809	2A	11.09	8.63502e-06	0.928119	0.202883	NA	2A
	AX-94799212	4B	111.19	5.54685e-06	0.608877	0.204766	7.83455	4D
	AX-94673458	5B	52.43	3.23372e-06	-0.980854	0.207071	NA	6B
	AX-95165934	6A	217.8	9.4838e-05	0.862114	0.192822	464.714	6D
	AX-95203033	6B	59.6	3.56764e-06	-0.946171	0.20665	506.727	6B
	AX-94461579	6B	62.83	1.04e-06	-1.98973	0.21195	513.692	6B
	AX-94416850	6B	67.99	2.39851e-09	1.06352	0.238753	659.234	6B
	AX-94674712	6B	62.83	2.66302e-06	-0.950815	0.207903	501.108	6B
	AX-94774307	6B	62.83	2.75075e-06	-0.994299	0.207764	NA	6D
	AX-94937357	6B	62.83	2.88456e-06	0.973136	0.20756	454.65	6B
	AX-94933582	6B	62.83	2.99904e-06	-1.62616	0.207393	457.074	6B
	AX-94710605	6B	62.83	4.89383e-06	0.974006	0.2053	506.269	6B
	AX-94542881	6B	62.83	5.7366e-06	-0.962413	0.204622	514.678	6B
	AX-94654857	6B	62.83	7.2635e-06	-0.955179	0.203618	505.801	6B
	AX-94553397	6B	62.83	1.28946e-05	0.915208	0.201183	487.681	6B
	AX-94988670	6B	62.83	1.3764e-05	-1.73978	0.200908	508.607	6B
	AX-95008333	6B	62.83	1.39229e-05	-0.852904	0.200859	501.064	6B
	AX-94561610	6B	62.83	1.66471e-05	0.906887	0.200104	511.423	6B
	AX-94838464	6B	62.83	2.50964e-05	-1.33683	0.198375	462.027	6B
	AX-95215114	6B	62.83	3.63333e-05	-0.864108	0.196822	500.896	6B
	AX-94864228	6B	62.83	3.70868e-05	1.4191	0.196736	431.175	6B
	AX-95086436	6B	62.83	7.2008e-05	1.58388	0.193966	500.21	6B
PGH	AX-94940584	1B	8.24	9.46514e-05	-1.22732	0.200146	15.8746	1B
	AX-94716155	1B	38.86	5.02798e-06	-1.44859	0.212388	518.812	1A
	AX-94873452	1B	38.86	3.12137e-05	1.3051	0.204732	419.735	1D
Aur_Col	AX-94464266	5A	70.36	2.47115e-11	1.08661	0.22256	706.24	5A
	AX-94472311	4B	22.53	9.40679e-05	1.0546	0.152416	653.447	4B
	AX-94952968	1A	58.79	0.0001	-1.282	0.151	16.3009	1A
Wax_LS	AX-95000081	6D	177.76	7.48944e-05	-0.943967	0.163551	5.36542	6D
	AX-94527988	3A	115.9	0.0001	-0.571668	0.160022	617.074	3A
Wax_Ped	AX-94527988	3A	115.9	2.87196e-05	-0.664895	0.150449	617.074	3A
Ear_S	AX-94670534	7B	146.84	1.94303e-05	-0.0988364	0.0829557	234.906	7B
Awn_P	AX-95082131	1A	54.04	3.2454e-08	-0.17975	0.316434	3.84713	1A
	AX-94859613	1A	88.71	7.28707e-06	0.152041	0.295636	454.229	1D
	AX-94607341	1A	54.04	3.94276e-05	-0.142916	0.289335	0.512662	1D
	AX-94982852	1A	58.79	4.65289e-05	-0.0993787	0.288723	15.1424	1B
	AX-94566415	1A	74.11	7.67228e-05	0.127827	0.286879	NA	1A
	AX-94580758	1B	51.55	1.10163e-10	-0.20886	0.339111	626.595	1B
	AX-95006323	1B	8.24	1.9899e-06	-0.180229	0.300545	16.4646	1B
	AX-94817261	1D	208.95	5.19462e-10	-0.294198	0.332846	583.365	1A
	AX-95137795	1D	236.5	1.45853e-05	-0.132246	0.293035	493.684	1D
	AX-94457975	2A	83.23	6.35684e-08	0.211323	0.313807	542.47	2A
	AX-94708947	2A	1.59	3.94993e-07	0.23742	0.30673	8.18164	2A
	AX-95128830	2A	1.59	5.76499e-07	-0.190732	0.305277	18.6451	2D
	AX-95112947	2B	27.22	1.35558e-08	-0.281401	0.319863	28.8839	2B
	AX-94687213	2B	53.31	4.38472e-07	-0.151102	0.306328	NA	2B
	AX-94629483	2B	187.28	8.5042e-05	-0.178134	0.286501	635.95	2D
	AX-94697767	3A	209.17	7.2094e-08	-0.155301	0.313316	724.493	3A
	AX-95633803	3B	0.79	8.45891e-06	-0.185003	0.295076	4.48706	3D
	AX-94455345	4A	72.97	2.46707e-05	0.14822	0.291075	117.89	4A
	AX-95156879	4A	97.19	2.8522e-05	0.130766	0.290536	3.8611	4B
	AX-95629916	4B	86.54	8.29322e-05	-0.25132	0.286593	526.929	4B
	AX-94581733	5A	72.22	1.07001e-07	-0.243386	0.31178	679.734	2B
	AX-94519690	5A	59.99	2.88469e-05	0.15991	0.290494	690.96	5A
	AX-95632082	5B	198.04	2.16436e-09	-0.202365	0.327133	603.882	5B
	AX-94480365	5B	232.96	9.3094e-06	-0.149786	0.294716	663.113	5B
	AX-94923750	5B	160.16	1.42925e-05	-0.0880151	0.293111	448.933	5D
	AX-94504637	5B	160.16	4.10882e-05	0.0813534	0.289183	548.435	5B
	AX-95120610	6B	130.12	6.50791e-06	0.172857	0.296062	461.977	6D
	AX-94512879	6B	62.83	3.43856e-05	0.241526	0.289842	NA	6B
	AX-94413428	6D	17.65	9.13889e-06	-0.16198	0.294786	464.721	6D
	AX-95019756	7A	29.9	1.1942e-08	-0.221142	0.320363	498.147	7B
	AX-94465215	7A	29.9	5.38565e-05	0.151844	0.288183	NA	7D
	AX-95109168	7B	1.72	1.02559e-08	-0.121337	0.320963	453.235	4B
	AX-94888246	7B	147.48	1.33564e-05	-0.143658	0.293364	338.505	4B
	AX-94759517	7B	24.53	2.01179e-05	0.14105	0.291835	718.359	7B
Awn_Col	AX-95097131	1B	24.64	8.2203e-06	0.762442	0.0875692	32.9735	2A
Awn_Att	AX-94519690	5A	59.99	8.51183e-06	0.393193	0.250176	32.9735	2A
	AX-94453668	5A	59.99	6.63742e-05	0.337658	0.242049	691.028	5A
	AX-94613491	5A	70.36	8.04171e-06	0.356558	0.250403	509.667	4D
Glu_Pub	AX-94506140	1A	50.59	1.46578e-07	0.489697	0.120413	590.818	7B
	AX-94618537	1A	75.74	4.62034e-05	0.724515	0.0925801	511.102	1A
	AX-94626335	1B	24.64	7.76907e-06	0.979242	0.101062	90.9928	1B
	AX-94664731	1B	24.64	0.000156163	0.3572	0.086	296.98	1D
	AX-95255429	2B	76.24	8.35993e-05	0.582477	0.0897918	45.6837	2D
	AX-94852847	2B	76.38	9.39663e-05	0.650848	0.0892442	72.8964	2B
	AX-95023665	2B	104.59	4.2099e-05	0.743488	0.0930191	750.018	2B
Ear_Col	AX-94980178	1B	8.24	5.84911e-07	-0.27671	0.105128	4.3461	1B
Sh_Wid	AX-94654809	2D	208.85	2.08021e-05	1.04738	0.146718	80.8205	2D
Grn_Ph	AX-94634529	2A	124.18	3.13874e-06	0.675759	0.167357	93.1909	2A
	AX-94608674	2A	124.18	4.78119e-06	1.68803	0.165467	568.945	2D
	AX-94825053	2A	124.18	6.62347e-06	0.639572	0.164008	710.36	2A
	AX-94738314	2A	124.32	1.39019e-05	0.598621	0.160705	711.075	2A
	AX-95205011	2A	124.89	5.33966e-08	-0.784526	0.185967	573.97	2D
	AX-94833084	2A	124.89	6.97684e-08	-0.786667	0.184729	690.211	2B
	AX-94635076	2A	124.89	1.45496e-06	1.31292	0.170825	574.351	2D
	AX-94750566	2A	124.89	4.21688e-05	-0.764959	0.155803	711.976	2A
	AX-94485323	2A	126.58	1.33989e-05	-0.520655	0.160869	577.599	2D
Germ_Wid	AX-94921234	4A	115.15	5.4813e-05	-0.597616	0.053052	612.114	4A
Brush_L	AX-94623333	3A	115.9	2.13044e-05	0.843733	0.205571	478.53	3D
Grn_Size	AX-95154008	7B	93.52	1.45e-05	-2.448	0.047	655.019	7B
	AX-95002032	1A	74.11	9.98e-05	2.545	0.037	637.962	3A
Grn_Tex	AX-94471990	6B	62.83	1.54317e-05	-1.06061	0.0851407	NA	6D
	AX-94451759	6B	62.83	1.9255e-05	-1.07193	0.0840721	506.875	6B
	AX-95148325	6B	62.83	1.9255e-05	-1.07193	0.0840721	320.715	6D
	AX-95086436	6B	62.83	8.04351e-05	-1.10904	0.0772252	500.21	6B
	AX-95172836	7A	100.09	1.24243e-05	-0.591164	0.0861894	667.337	7A
	AX-94464653	7A	100.09	4.84531e-05	-0.984712	0.0796413	666.807	7A
	AX-94583333	7A	100.52	6.76786e-05	-0.942403	0.0780469	638.885	7A
