# Supplementary material for: Uncovering Genomic Regions Associated With 36 Agro-Morphological Traits in Indian Spring Wheat Using GWAS
Source: Front Plant Sci. 2019 Apr 25;10:527. doi: 10.3389/fpls.2019.00527 (PMC6511880; doi:10.3389/fpls.2019.00527)
Supplement: Supplementary file 15 [file Table_9.xlsx]

## Sheet: Sheet1
Additional Table S9: MTAs detected for 23 Agro-morphological traits in 402 Genotypes
s.no	Traits	SNP marker	Chr	Flank	Allele A	Allele B	cust_id	PS ID 820k	IC296432	GW496	WH1126	LGM133	HUW12	GL27	GW2002-18	MACS6145	lok41	MACS6222	GL23	MP1201	IC321855	GW173	HTW-11	L5(AL)	HS365	PBW175	IC322001	RNB1001	IC322007A	KRL35	MBL5	IC321979	WH730	WH1061	HPW251	NIAW917	PusaT3336	GL6	LGM245	HPW266	HW2001	ISD215	WH423	LGM251	VL639	LALBAHADUR	NIAW34	Pusa2019A	HS240
1	C_Col	AX-94962809	2A	CCCAAACAGATCAAACACCTCCAATACAGGGCACC[A/C]CTTAATCTTCAGAACCCTTAAACTAGAGTTCAAGT	A	C	BA00626170	AX-94962809	AA	AA	AA	AA	AA	NN	AA	AA	AA	AA	NN	AA	AA	AA	CC	AA	AA	AA	AA	AA	AA	AA	AA	AA	AA	AA	AA	AA	AA	NN	CC	AA	AA	AA	AA	CC	AA	AA	AA	AA	AA
2	C_Col	AX-94799212	4B	GCTAGATGGATCGACAGCATCAAGAGCGAGCCCAG[C/T]CTTGCGCAAACGGTGCAGCAGCTGCTGCTGCAGGA	T	C	BA00169333	AX-94799212	CC	CC	CC	TT	CC	TT	CC	CC	CC	CC	CC	CC	TT	CC	CC	CC	TT	CC	TT	CC	TT	CC	CC	CC	CC	CC	CC	CC	TT	NN	TT	CC	TT	CC	CC	TT	TT	CC	CC	CC	CC
3	C_Col	AX-94673458	5B	TTTCCCTTGCGGCCTATTGACGCCCAGATCTGGTC[C/T]CCCTCTCCTCCCCACACCCTCATGGTATCCACTTA	T	C	BA00606694	AX-94673458	TT	TT	TT	TT	TT	CC	TT	TT	TT	TT	CC	TT	TT	TT	CC	TT	TT	TT	TT	TT	CC	TT	TT	TT	TT	TT	TT	TT	TT	TT	CC	TT	TT	TT	TT	CC	TT	TT	TT	TT	TT
4	C_Col	AX-95165934	6A	AACTACCTGTTCCTGGGCGACTACGTGGACCGGGG[C/G]AAGCAGAGCATCGAGACCATCTGCCTACTGCTAGC	C	G	BA00465606	AX-95165934	CC	CC	CC	CC	CC	GG	CC	CC	CC	CC	CC	CC	CC	CC	CC	CC	CC	CC	CC	CC	CC	CC	CC	CC	CC	CC	CC	CC	CC	NN	CC	CC	CC	CC	CC	GG	CC	CC	CC	CC	CC
5	C_Col	AX-95203033	6B	CAGTAATACTAGGTTCGAGGGTCTGAACTTTGTTG[C/T]ATTGAATGTTACACCCATGTAATAGTTTTCTTTGC	T	C	BA00647278	AX-95203033	TT	TT	TT	TT	TT	CC	TT	TT	TT	TT	CC	TT	TT	TT	CC	TT	TT	TT	TT	TT	CC	TT	TT	TT	TT	TT	TT	TT	TT	TT	CC	TT	TT	TT	TT	CC	TT	TT	TT	TT	TT
6	C_Col	AX-94461579	6B	TGGCTATCCCGTGGTTTACACGGGTTGATGAATGT[A/G]TGTTGTACTTAAAGCATCTGAACGACCGCGTCCCC	A	G	BA00443903	AX-94461579	GG	GG	GG	GG	GG	AA	GG	GG	GG	GG	AA	GG	GG	GG	AA	GG	GG	GG	GG	GG	AA	GG	GG	GG	GG	GG	GG	GG	GG	GG	AA	GG	GG	GG	GG	AA	GG	GG	GG	GG	GG
7	C_Col	AX-94416850	6B	CAATGGGGACAAAATGGGTGTTTCTTCCACGAATT[C/T]CCCTGTCGACGCCGGGGAACTGGCCCACCTGCGGA	T	C	BA00196801	AX-94416850	TT	CC	TT	TT	TT	TT	TT	CC	TT	TT	TT	TT	TT	TT	CC	CC	TT	TT	TT	TT	TT	TT	TT	TT	TT	TT	TT	TT	TT	TT	CC	TT	TT	TT	TT	TT	TT	TT	TT	TT	TT
8	C_Col	AX-94674712	6B	CACAACAACATCAAATGTGCAGTACATTACTCAGT[G/T]ATACACTGTGGTTTGCACTATTATTCTGCTTGGAT	T	G	BA00612927	AX-94674712	TT	TT	TT	TT	TT	GG	TT	TT	TT	TT	GG	TT	TT	TT	GG	TT	TT	TT	TT	TT	GG	TT	TT	TT	TT	TT	TT	TT	TT	TT	GG	TT	TT	TT	TT	GG	TT	TT	TT	TT	TT
9	C_Col	AX-94774307	6B	CACAATACAACTCATTACTTAGCTCATGGTATCGA[C/T]CTAGAAATTCCACCGGGGCTGCAACGAGCCCTTCC	T	C	BA00099975	AX-94774307	TT	TT	TT	TT	TT	CC	TT	TT	TT	TT	CC	TT	TT	TT	CC	TT	TT	TT	TT	TT	CC	TT	TT	TT	TT	TT	TT	TT	TT	TT	CC	TT	TT	TT	TT	CC	TT	TT	TT	TT	TT
10	C_Col	AX-94937357	6B	CCACTCGCATGGGCCTCAGCGAACTGTTTC[C/T]GTGAAGGATGTAATCTGCGTCCTGGAGAGGGAGCC	T	C	BA00555480	AX-94937357	CC	CC	CC	CC	CC	TT	CC	CC	CC	CC	TT	CC	CC	CC	TT	CC	CC	CC	CC	CC	TT	CC	CC	CC	CC	CC	CC	CC	NN	CC	TT	CC	CC	CC	CC	TT	CC	CC	CC	CC	CC
11	C_Col	AX-94933582	6B	GTCGGCAGGTGGTCACTGAGAGTCGCTGCTGCTTT[A/C]ATGTACTTGAAGTGGAAGTACTTCACAAATACCAG	A	C	BA00544821	AX-94933582	CC	CC	CC	CC	CC	AA	CC	CC	CC	CC	AA	CC	CC	CC	AA	CC	CC	CC	CC	CC	AA	CC	CC	CC	CC	CC	CC	CC	CC	CC	AA	CC	CC	CC	CC	AA	CC	CC	CC	CC	CC
12	C_Col	AX-94710605	6B	GATACTCAGAAGGCTCGAGGAGATAGCAAAATGAT[C/T]ACTTAATTTAATTAAATGTGGGTAGGTTCACCATT	T	C	BA00788727	AX-94710605	CC	CC	CC	CC	CC	TT	CC	CC	CC	CC	TT	CC	CC	CC	TT	CC	CC	CC	CC	CC	TT	CC	CC	CC	CC	CC	CC	CC	CC	CC	TT	CC	CC	CC	CC	TT	CC	CC	CC	CC	CC
13	C_Col	AX-94542881	6B	TGATCTTGGTGTATGCCCTTTGCGTGTAGGTAGAC[C/G]GGTTTGGTGCGCGGTTTCTGAGCAAGCGCCGCCGG	C	G	BA00891818	AX-94542881	GG	GG	GG	GG	GG	CC	GG	GG	GG	GG	CC	GG	GG	GG	CC	GG	GG	GG	GG	GG	CC	GG	GG	GG	GG	GG	GG	GG	GG	GG	CC	GG	GG	GG	GG	CC	GG	GG	GG	GG	GG
14	C_Col	AX-94654857	6B	GTGGTGGTTCAGAGGGTGAAGTCGAAGATGAGAAG[G/T]CTCGAAAGAAGAGGGAGAAAATGGAGAAAAAGGCA	T	G	BA00516385	AX-94654857	TT	TT	TT	TT	TT	GG	TT	TT	TT	TT	GG	TT	TT	TT	GG	TT	TT	TT	TT	TT	GG	TT	TT	TT	TT	TT	TT	TT	TT	TT	GG	TT	TT	TT	TT	GG	TT	TT	TT	TT	TT
15	C_Col	AX-94553397	6B	ACTACCTGAGGCACCAGGCGATGCAGATTGTTTCG[A/G]CAAGGCTTAGCCGTGCTGAGCCTCCTCTGCGCAGG	A	G	BA00023430	AX-94553397	AA	AA	AA	AA	AA	GG	AA	AA	AA	AA	GG	AA	AA	AA	GG	AA	AA	AA	AA	AA	GG	AA	AA	AA	AA	AA	AA	AA	AA	AA	GG	AA	AA	AA	AA	GG	AA	AA	AA	AA	AA
16	C_Col	AX-94988670	6B	TCTTTTCGTGGTAACGTGAAAACAGCTGGCCCATC[A/G]TCTCATGTGTAAAAACTGAAATCATATGGGCAGTG	A	G	BA00698762	AX-94988670	GG	GG	GG	GG	GG	AA	GG	GG	GG	GG	AA	GG	GG	GG	AA	GG	GG	GG	GG	GG	AA	GG	GG	GG	GG	GG	GG	GG	GG	GG	AA	GG	GG	GG	GG	AA	GG	GG	GG	GG	GG
17	C_Col	AX-95008333	6B	GGTCTCGCACGCCGCTGCATTGTGCAGATTTCATA[C/T]GCCATTGGTGTGCCTGAGCCCCTGTCTGTGTTCGT	T	C	BA00753271	AX-95008333	TT	TT	TT	TT	TT	CC	TT	TT	TT	TT	CC	TT	TT	TT	CC	TT	TT	TT	TT	TT	CC	TT	TT	TT	TT	TT	TT	TT	TT	TT	CC	TT	TT	TT	TT	CC	TT	TT	TT	TT	TT
18	C_Col	AX-94561610	6B	CTTCCCCGCTCCAAATCCCCAATTTTCTTCGATAT[A/T]TCTAACGTATCCGTCCATCGATCTCACCTCCGATC	A	T	BA00063043	AX-94561610	AA	AA	AA	AA	AA	TT	AA	AA	AA	AA	TT	AA	AA	AA	TT	AA	AA	AA	AA	AA	TT	AA	AA	AA	AA	AA	AA	AA	AA	AA	TT	AA	AA	AA	AA	TT	AA	AA	AA	AA	AA
19	C_Col	AX-94838464	6B	ACAGCTTAAGGGAGTAATGAGCTATGTTATGCTTG[A/G]GTAAGATGATATGATCGTGCGGTCTGCTATCAGAG	A	G	BA00279065	AX-94838464	GG	AA	GG	AA	GG	AA	GG	GG	GG	GG	AA	GG	GG	GG	AA	GG	AA	GG	GG	GG	AA	GG	GG	GG	GG	GG	GG	GG	GG	GG	AA	GG	GG	GG	GG	AA	AA	GG	GG	GG	GG
20	C_Col	AX-95215114	6B	GAAGAAGCATTAGACATTGAAGCGACGCTCTACAC[G/T]GGTCTTGTTGTATGGTAGTCAGTGCTAAGTTTCTT	T	G	BA00698245	AX-95215114	TT	TT	TT	TT	TT	GG	TT	TT	TT	TT	GG	TT	TT	TT	GG	TT	TT	TT	TT	TT	GG	TT	TT	TT	TT	TT	TT	TT	TT	TT	GG	TT	TT	TT	TT	GG	TT	TT	TT	TT	TT
21	C_Col	AX-94864228	6B	GGACGCCGTGCCTAGCTACGTCGTCGGTATTTGCT[A/C]TTGTATTCTTGTATGTGTTTGGTGTGCACGTGATT	A	C	BA00351084	AX-94864228	CC	CC	CC	CC	CC	CC	CC	AA	CC	CC	CC	CC	CC	CC	CC	AA	CC	CC	CC	CC	CC	CC	CC	CC	CC	CC	CC	CC	CC	AA	CC	CC	CC	CC	CC	CC	CC	CC	CC	CC	CC
22	C_Col	AX-95086436	6B	GTTTCCGAGGCGACAGTTTTGCAGCGCTGGAAACC[A/G]TAGCTAGGGTCGAATGATGTTGCCGTCCCCTGTTA	A	G	BA00079518	AX-95086436	AA	AA	AA	AA	AA	GG	AA	AA	AA	AA	GG	AA	AA	AA	GG	AA	AA	AA	AA	AA	GG	AA	AA	AA	AA	AA	AA	AA	AA	AA	GG	AA	AA	AA	AA	GG	AA	AA	AA	AA	AA
23	PGH	AX-94940584	1B	CGGCAGTGTATGCACGTCCATGGGGTCAGTGGAGG[A/G]TCGAGGCAGTACGAGTGTACCCACTGCGATCGGCA	A	G	BA00564679	AX-94940584	AA	AA	GG	GG	GG	AA	AA	AA	AA	AA	GG	AA	GG	GG	AA	AA	AA	AA	GG	GG	AA	AA	AA	AA	AA	AA	AA	GG	AA	AA	AA	AA	GG	AA	AA	AA	AA	GG	AA	AA	GG
24	PGH	AX-94716155	1B	GCAAGAGGCCGTACGACGTCCATGAGATGGTGGGC[C/G]CGGTGGAGGTCATCCCCACGCCGCCTGCGGCGAGC	C	G	BA00815966	AX-94716155	CC	CC	CC	CC	CC	GG	CC	CC	CC	CC	GG	CC	CC	CC	CC	CC	CC	CC	CC	CC	CC	CC	CC	CC	CC	CC	CC	CC	CC	GG	GG	CC	CC	CC	CC	GG	CC	CC	CC	CC	CC
25	PGH	AX-94873452	1B	CTGAGGGGCAACATAGCAGATTCAGAAATGGCTTC[C/T]GTTAGCAGTCCCGGGCGGTTTAGCAGAGGCAACTT	T	C	BA00376856	AX-94873452	TT	TT	TT	TT	TT	CC	TT	TT	TT	TT	CC	TT	TT	TT	TT	TT	TT	TT	TT	TT	TT	TT	TT	TT	TT	TT	TT	TT	TT	CC	CC	TT	TT	TT	TT	CC	TT	TT	TT	TT	TT
26	Aur_Col	AX-94464266	5A	GCGAGTGATCCGGACATTTTCTACACCGACCAGCA[C/T]GGGACTAGGAACATTGAGTACCTCACCCTTGGAGT	T	C	BA00458523	AX-94464266	CC	CC	NN	CC	CC	TT	CC	TT	CC	CC	CC	CC	CC	CC	CC	CC	CC	CC	CC	CC	CC	TT	CC	CC	CC	CC	TT	CC	CC	CC	CC	CC	CC	TT	CC	TT	CC	CC	CC	CC	CC
27	Aur_Col	AX-94472311	4B	CTCTTCTCACAAACAACCCACACTCAAAACTCGGA[C/G]AAAACTCAAAATAGAATAAAACAGCAGTAGGTGAG	C	G	BA00502765	AX-94472311	CC	CC	CC	CC	CC	CC	CC	CC	GG	CC	CC	GG	CC	CC	CC	CC	CC	CC	CC	CC	CC	CC	CC	CC	GG	CC	GG	GG	CC	NN	CC	GG	CC	CC	GG	CC	CC	CC	GG	GG	CC
28	Aur_Col	AX-94952968	1A	AGAAAGTGACAACAGGAACCACATTACGGAAGCTA[C/G]AATCATCGCGCAGCTTCCTCACCTGCTCAGATTGC	C	G	BA00598832	AX-94952968	GG	GG	GG	GG	GG	GG	GG	GG	GG	GG	GG	GG	GG	GG	GG	GG	CC	GG	GG	GG	GG	CC	GG	CC	GG	GG	GG	GG	GG	GG	GG	GG	GG	GG	CC	GG	GG	GG	CC	GG	GG
29	Wax_LS	AX-95000081	6D	ACAAGGGCACGTATCTCTTGTTGGCCGTACCTCCT[C/G]ACCCGAGGCTCCGCGGCGTCACGTAACCTTCTCTC	C	G	BA00730361	AX-95000081	GG	GG	GG	GG	GG	GG	GG	GG	GG	GG	GG	GG	CC	CC	GG	CC	CC	GG	CC	GG	GG	CC	GG	GG	GG	CC	GG	GG	GG	CC	GG	CC	NN	CC	GG	GG	GG	CC	GG	GG	CC
30	Wax_LS	AX-94527988	3A	GCCGCGATGGTCTCCGTCATGAACTGGTCCACCAC[C/T]GCGAGGCTCTTGCGGAGGCTGTGCTCGCTGCCGAT	T	C	BA00810497	AX-94527988	TT	TT	TT	TT	TT	TT	TT	TT	CC	CC	TT	CC	TT	CC	TT	TT	TT	CC	TT	CC	TT	TT	TT	CC	TT	TT	TT	TT	TT	TT	TT	CC	TT	TT	CC	TT	TT	NN	TT	CC	CC
31	Wax_Ped	AX-94527988	3A	GCCGCGATGGTCTCCGTCATGAACTGGTCCACCAC[C/T]GCGAGGCTCTTGCGGAGGCTGTGCTCGCTGCCGAT	T	C	BA00810497	AX-94527988	TT	TT	TT	TT	TT	TT	TT	TT	CC	CC	TT	CC	TT	CC	TT	TT	TT	CC	TT	CC	TT	TT	TT	CC	TT	TT	TT	TT	TT	TT	TT	CC	TT	TT	CC	TT	TT	NN	TT	CC	CC
32	Ear_S	AX-94670534	7B	CGTCCAGGTGGAAGTGCAGCACTTAGAAGACATGG[G/T]TCGGTTCCCCCCGTTCGGCGTTTCTCCGAAATACA	T	G	BA00592820	AX-94670534	TT	TT	GG	TT	TT	TT	TT	TT	TT	TT	TT	TT	TT	TT	GG	TT	TT	TT	TT	TT	TT	TT	TT	TT	TT	TT	TT	TT	TT	TT	TT	TT	TT	TT	TT	TT	TT	TT	TT	TT	TT
33	Awn_P	AX-95082131	1A	CATAAATCCACCATGAAGACCTTACTCATCCTGAC[A/G]ATCATTGCGGTGGCACTAACTACCACCACCGCCAA	A	G	BA00058324	AX-95082131	AA	AA	AA	AA	AA	AA	AA	AA	AA	AA	AA	AA	NN	AA	AA	AA	GG	AA	AA	AA	AA	AA	GG	AA	AA	AA	AA	AA	AA	GG	AA	AA	AA	AA	AA	AA	AA	AA	GG	AA	AA
34	Awn_P	AX-94859613	1A	CAGATCAGACCAGACCAAACCAGACCAGGTGTGTG[A/C]TGTACCATGTGCTTCTTGAATTAGACTACTTACAT	A	C	BA00338195	AX-94859613	AA	CC	AA	AA	AA	CC	AA	CC	CC	CC	CC	CC	CC	AA	AA	CC	CC	AA	CC	AA	AA	CC	CC	CC	CC	AA	AA	NN	CC	AA	CC	CC	CC	AA	AA	CC	AA	AA	CC	NN	AA
35	Awn_P	AX-94607341	1A	CAATGGTTCTCTTTGTTCCCGCAGGCAAAGCCTTC[A/G]ATCCTCACTTTTGGGCTGCTACTCGCCCCGCAAGA	A	G	BA00286043	AX-94607341	GG	AA	AA	GG	GG	AA	GG	AA	GG	GG	AA	GG	AA	GG	AA	NN	GG	GG	GG	GG	AA	GG	GG	AA	GG	GG	AA	AA	GG	GG	AA	AA	GG	GG	AA	AA	GG	GG	GG	GG	GG
36	Awn_P	AX-94982852	1A	TCTATGAAGGCATACAAGTTCTTCCAGATGGCAGT[A/G]TACCCACACATCTTTATATCAAACCCATCTCCAGG	A	G	BA00682615	AX-94982852	GG	AA	AA	AA	AA	AA	AA	AA	AA	GG	AA	AA	AA	AA	AA	AA	AA	GG	AA	AA	AA	NN	AA	GG	GG	GG	GG	AA	AA	AA	AA	AA	AA	GG	GG	AA	AA	AA	AA	GG	AA
37	Awn_P	AX-94566415	1A	CTCCTTCAGAACAAAGAACAAAGTAACAGTTCGTC[A/G]CAATATCCTTAAGTCGTCGGCCGCTGCATTTTAGA	A	G	BA00086247	AX-94566415	GG	AA	AA	GG	GG	GG	GG	AA	GG	GG	AA	GG	GG	GG	AA	AA	GG	GG	GG	GG	GG	AA	GG	GG	GG	AA	GG	GG	AA	GG	AA	GG	GG	GG	GG	AA	GG	GG	GG	NN	GG
38	Awn_P	AX-94580758	1B	CCACCACCAGCTGGGCCAAGTACTTCATGGCGTCT[A/C]TCTGAAACAACAGATTGATCGACTAGTAGTGAGCT	A	C	BA00156074	AX-94580758	CC	CC	CC	CC	CC	CC	CC	CC	CC	CC	CC	AA	CC	CC	AA	AA	CC	CC	CC	CC	CC	CC	AA	CC	CC	CC	AA	CC	CC	AA	CC	AA	CC	CC	CC	CC	CC	CC	AA	AA	CC
39	Awn_P	AX-95006323	1B	TGATGCTGAGATAGAGGTCCTGCCAGTCGATGCGT[G/T]GGTGACCCAGGACTTAAGGCCCGACCGTGTCCAAA	T	G	BA00747791	AX-95006323	GG	GG	GG	GG	GG	GG	GG	GG	GG	TT	GG	GG	GG	GG	GG	GG	NN	TT	GG	GG	GG	GG	GG	TT	TT	TT	TT	GG	GG	GG	GG	GG	GG	GG	TT	GG	GG	GG	GG	TT	GG
40	Awn_P	AX-94817261	1D	GATTCGCACGTCCCTTGTCTGCAAGCGATGGCACT[C/G]CCTCGTCAAAAACCGCCAATTCGTCAGCCGCTTTC	C	G	BA00219837	AX-94817261	GG	CC	GG	CC	CC	GG	GG	GG	GG	GG	GG	GG	GG	CC	GG	GG	GG	CC	CC	CC	GG	GG	CC	CC	GG	CC	CC	CC	GG	GG	GG	CC	CC	CC	CC	GG	GG	CC	CC	CC	CC
41	Awn_P	AX-95137795	1D	AGCGACTTGAGCTCCACCACGCCGGCCGCCACGGT[A/G]GGCGTCGTCTTGAGCTCGCGCAGCTTCTCCGTCAG	A	G	BA00328659	AX-95137795	GG	AA	GG	AA	AA	GG	GG	GG	GG	GG	GG	GG	GG	NN	GG	GG	GG	AA	AA	AA	GG	GG	AA	AA	GG	AA	AA	NN	GG	GG	GG	AA	AA	AA	AA	GG	GG	AA	AA	AA	AA
42	Awn_P	AX-94457975	2A	GTCTCGGTCGCTACTCGACATGCATGGATCGCAGT[A/G]TGTACTTATGTGACTGAATAGGCCATGGATGGATG	A	G	BA00424183	AX-94457975	AA	GG	AA	AA	AA	GG	AA	AA	AA	AA	GG	AA	GG	AA	GG	GG	AA	AA	AA	AA	GG	AA	AA	AA	AA	AA	AA	AA	AA	GG	GG	AA	AA	AA	AA	GG	AA	AA	AA	NN	AA
43	Awn_P	AX-94708947	2A	TCTGGGCAAACACCAACTACCAGTCTGCTGGTTTG[A/G]GACAGCTTGCTCCGTCGTTCCCTGTCCTGAGCATC	A	G	BA00780937	AX-94708947	AA	AA	AA	AA	AA	AA	AA	AA	AA	AA	AA	AA	AA	AA	AA	AA	AA	AA	AA	AA	AA	AA	AA	AA	AA	AA	AA	AA	AA	AA	AA	AA	AA	AA	AA	AA	AA	AA	AA	NN	AA
44	Awn_P	AX-95128830	2A	GAAGCGGCTGCTAAGAAAAAAGATGAAGGGAACGT[C/G]TGGTTTAAGATGGGCAAGTATGCCAGGGCTTCTAA	C	G	BA00285240	AX-95128830	GG	CC	CC	CC	CC	GG	GG	GG	CC	CC	GG	CC	CC	CC	GG	GG	CC	CC	CC	CC	CC	CC	GG	CC	CC	CC	CC	CC	CC	GG	GG	CC	CC	CC	CC	GG	CC	CC	CC	CC	CC
45	Awn_P	AX-95112947	2B	GGCTGCCCCGTGGATGCACGGAGGAGCGCGTGCCA[A/G]AGCAGCCATGCTTCCTGCCGCAATGTCTCCGGCAT	A	G	BA00208625	AX-95112947	GG	AA	GG	GG	GG	GG	GG	GG	GG	GG	GG	GG	GG	GG	GG	GG	GG	GG	GG	GG	GG	GG	GG	GG	GG	GG	GG	GG	AA	GG	GG	GG	GG	GG	GG	GG	GG	GG	GG	GG	GG
46	Awn_P	AX-94687213	2B	CGGCTTGCCTTCCTTGACACAGATGCTGCAGGGAG[A/G]GCATTACCCCGGATCATTGAGATCTTAGCTTTGGA	A	G	BA00673514	AX-94687213	GG	AA	GG	AA	AA	GG	GG	AA	AA	GG	AA	GG	AA	AA	GG	GG	AA	GG	AA	AA	GG	NN	AA	AA	AA	AA	AA	AA	GG	AA	GG	AA	AA	AA	AA	AA	AA	AA	AA	AA	AA
47	Awn_P	AX-94629483	2B	CTGAATCTTACCGGTAATGTTTTATTATGTACCGC[A/G]TGCTTGACATTCAGAAGTTTGCAATGAATCATTGT	A	G	BA00394024	AX-94629483	AA	GG	GG	GG	GG	AA	GG	GG	AA	GG	AA	GG	AA	GG	AA	GG	GG	AA	GG	GG	GG	GG	AA	AA	AA	GG	GG	GG	GG	GG	AA	GG	AA	GG	GG	AA	GG	GG	GG	GG	GG
48	Awn_P	AX-94697767	3A	GTGGAGACCCTGTGCGGACAAGCCTTCGGTGCGCA[A/C]AAGTACAACATGCTCGGAACCTACCTACAACGCTC	A	C	BA00725724	AX-94697767	CC	CC	AA	CC	CC	AA	AA	AA	AA	CC	AA	CC	CC	CC	CC	CC	AA	CC	AA	AA	CC	CC	CC	AA	CC	CC	AA	AA	CC	AA	AA	CC	CC	CC	AA	CC	CC	CC	AA	AA	CC
49	Awn_P	AX-95633803	3B	GTCGGTGAAAGCGGCGATACAGATTATGAAGGGCT[A/G]CTCGGAGGCGTGCAGAAGACCATCGTACTCAAAGG	A	G	BA00063170	AX-94561636	AA	GG	GG	AA	AA	GG	AA	GG	AA	AA	GG	AA	GG	AA	GG	GG	AA	GG	AA	AA	AA	AA	GG	AA	AA	AA	GG	GG	GG	NN	GG	AA	AA	AA	AA	GG	AA	AA	AA	AA	AA
50	Awn_P	AX-94455345	4A	CACCTTAGAGTTTTTTAGTTACATTGTTTTCGGTG[A/C]GCATGGATTTGAAGGTATTTACGCAGGTATTAGAA	A	C	BA00409855	AX-94455345	CC	CC	CC	CC	CC	CC	CC	CC	CC	CC	CC	AA	CC	CC	CC	CC	CC	CC	AA	CC	CC	CC	CC	AA	AA	AA	AA	CC	NN	CC	CC	AA	AA	CC	CC	CC	CC	CC	CC	NN	CC
51	Awn_P	AX-95156879	4A	GCTGCTCGCATGGTTCATCTCATGCTCGCGTCCTT[A/G]CTGCATCGCTTTGAGTGGAGGCTTCCCGTAGATGT	A	G	BA00420988	AX-95156879	GG	GG	GG	GG	GG	GG	GG	GG	GG	GG	GG	GG	GG	GG	GG	GG	GG	GG	GG	GG	GG	GG	GG	GG	NN	GG	GG	GG	GG	GG	AA	NN	GG	GG	GG	GG	GG	GG	GG	NN	GG
52	Awn_P	AX-95629916	4B	GTGTGTTGTGCTATTTTAGCTGTAGTTTATGCTTA[A/C]TCACTTTGGCTGAAATGGTGTGGTGTGCTGTGTTT	A	C	BA00552182	AX-94481303	AA	AA	CC	AA	AA	AA	AA	AA	AA	CC	AA	AA	AA	AA	AA	AA	AA	AA	AA	AA	AA	AA	AA	AA	AA	AA	AA	AA	AA	AA	AA	AA	AA	AA	AA	AA	AA	AA	AA	AA	AA
53	Awn_P	AX-94581733	5A	AGCTGAGGCAGAATTTATGTTCTTTGATAGAGCTG[A/C]AAAGAGTGCTGTTGGGAAGCCACTCATGACTTTGA	A	C	BA00160693	AX-94581733	CC	AA	CC	AA	CC	AA	CC	AA	CC	CC	AA	CC	AA	CC	AA	AA	AA	CC	AA	CC	AA	AA	AA	AA	CC	CC	CC	CC	AA	AA	AA	CC	CC	CC	AA	AA	AA	CC	AA	AA	CC
54	Awn_P	AX-94519690	5A	TCGCCTCATTGTGGCCTCAACTGGGTGTGATGAAG[C/T]CTGTTGGAGTTGAGTTTGTGCTTTGGTTCATTTGA	T	C	BA00764929	AX-94519690	TT	TT	CC	TT	TT	TT	TT	TT	TT	TT	TT	TT	TT	TT	TT	TT	TT	TT	TT	TT	TT	TT	TT	TT	TT	TT	TT	TT	CC	TT	TT	TT	TT	TT	TT	TT	TT	TT	TT	TT	TT
55	Awn_P	AX-95632082	5B	CTGCAGAACCTCTTCTGGAAGGCGGACGGCTGCTC[A/G]TCGTGCTCCGGGAACCCTAACTTCGGGTGCGTCGA	A	G	BA00436396	AX-94460196	AA	GG	GG	GG	AA	GG	GG	AA	GG	AA	GG	AA	GG	AA	GG	GG	AA	GG	GG	AA	AA	AA	GG	GG	GG	AA	GG	GG	AA	GG	GG	GG	AA	AA	AA	GG	AA	AA	AA	AA	AA
56	Awn_P	AX-94480365	5B	CGCCACTGAGAGAGCATGCGGAAGAGACACCAATG[A/C]AGGAGTTTAACAGGGCTGTTATCTCAGAGAGAATG	A	C	BA00547170	AX-94480365	CC	AA	CC	CC	CC	CC	AA	AA	AA	CC	CC	CC	CC	CC	CC	CC	CC	CC	AA	AA	CC	NN	AA	CC	CC	CC	CC	CC	CC	CC	CC	CC	CC	CC	CC	CC	CC	CC	CC	CC	CC
57	Awn_P	AX-94923750	5B	AGCTGCTTGTTTACGAGCACTTGGAGAAGGGCAAC[C/T]TCGACGACTGGCTGCACCACCGTTACCGCGAGGGC	T	C	BA00517461	AX-94923750	CC	CC	CC	CC	CC	CC	CC	TT	CC	TT	NN	TT	TT	CC	CC	TT	CC	TT	CC	CC	CC	CC	CC	CC	TT	CC	CC	CC	TT	CC	CC	CC	CC	CC	CC	TT	NN	CC	CC	CC	CC
58	Awn_P	AX-94504637	5B	CAGATGTGTGAATGGTGTCATTTTCCAGCCAGTCA[C/T]GACTTCTTTCACCACTTATGTGTTCTCCCAGCGCC	T	C	BA00681710	AX-94504637	TT	TT	CC	TT	TT	TT	TT	CC	TT	CC	CC	CC	CC	TT	TT	CC	TT	CC	TT	TT	TT	TT	TT	TT	CC	TT	TT	TT	CC	TT	TT	TT	TT	TT	TT	CC	TT	TT	TT	TT	TT
59	Awn_P	AX-95120610	6B	ATGTGGAGAGATGCATACGCATCGGTATTACCGGC[A/G]TTATCTGCCGTTGCTTTCCTAAAAATGGTGTTGGT	A	G	BA00245733	AX-95120610	AA	GG	GG	GG	AA	GG	GG	GG	AA	AA	GG	AA	GG	AA	GG	GG	AA	AA	AA	AA	GG	GG	GG	AA	AA	GG	GG	GG	GG	GG	GG	GG	GG	AA	AA	GG	AA	AA	GG	AA	AA
60	Awn_P	AX-94512879	6B	CTGTATATACACAAGCTGAGTATCTTGAACTGGTA[A/G]GTGGTCTTGATGAAGATCACAGGTCAACTGGTGGG	A	G	BA00727480	AX-94512879	GG	AA	GG	GG	GG	AA	GG	AA	GG	GG	AA	GG	GG	GG	AA	AA	GG	GG	GG	GG	AA	GG	GG	GG	GG	GG	GG	GG	AA	GG	AA	GG	GG	GG	GG	AA	GG	GG	GG	NN	GG
61	Awn_P	AX-94413428	6D	ATCACAAACCAAGCCGCACCAGAAATTAGATCTGC[A/G]AAGCTTGAAAATCCCAGAAAACAACCTGAAGTGCA	A	G	BA00178114	AX-94413428	AA	AA	AA	GG	AA	AA	AA	AA	GG	AA	AA	AA	AA	GG	AA	AA	AA	AA	GG	AA	GG	GG	AA	GG	GG	GG	AA	AA	AA	AA	AA	AA	AA	GG	GG	AA	GG	GG	GG	GG	GG
62	Awn_P	AX-95019756	7A	TCTGCATCTGGTACAGTGGCTACACAAAGGACGGC[A/G]TCAGAATTCAGCTGGCGCTATATTCCTGGTGCAGG	A	G	BA00785259	AX-95019756	AA	AA	AA	GG	AA	AA	AA	AA	AA	AA	AA	AA	AA	AA	AA	AA	AA	AA	AA	AA	AA	AA	GG	GG	GG	GG	AA	AA	GG	AA	AA	AA	AA	AA	AA	AA	AA	AA	GG	GG	AA
63	Awn_P	AX-94465215	7A	TACTCTGTGTTTAGGTAAAAATGCCAGAGCCAGAT[C/T]TGAATGTTTCAAGTGATTACCCTGAAAAAGGCTGC	T	C	BA00463932	AX-94465215	TT	CC	TT	TT	TT	TT	TT	TT	TT	TT	TT	TT	TT	TT	TT	TT	TT	TT	CC	TT	TT	TT	TT	TT	TT	TT	TT	TT	CC	TT	TT	TT	CC	TT	TT	TT	TT	TT	TT	TT	TT
64	Awn_P	AX-95109168	7B	GTGCCCATGGTGATGTCGAAGACGCTTCCTCTCCT[A/G]CTGGTTGTTCCTCGTTCCCAAGCCTCGGCTTTTGC	A	G	BA00190270	AX-95109168	GG	AA	AA	AA	GG	AA	AA	GG	AA	AA	AA	GG	AA	GG	AA	GG	AA	AA	AA	GG	AA	GG	AA	AA	GG	GG	GG	GG	AA	AA	AA	AA	GG	GG	AA	AA	NN	GG	GG	AA	GG
65	Awn_P	AX-94888246	7B	GCGGATCTATCCGGGGGTCGTCTTATTTTCCAGTC[C/T]CGTGTGACTTCCGTTTTATGCTTATATTTGGTGGT	T	C	BA00418469	AX-94888246	CC	CC	CC	CC	CC	CC	CC	CC	CC	CC	CC	CC	CC	CC	CC	CC	CC	CC	CC	CC	CC	CC	CC	CC	CC	CC	CC	CC	CC	CC	CC	CC	CC	CC	CC	CC	CC	CC	CC	CC	CC
66	Awn_P	AX-94759517	7B	GCAAACATGCAGCATCAGGCTGTCTCTAACTTGGA[C/G]GCTGCTCAAGGAGGCAATTTGAATTCTTTGCAGCA	C	G	BA00058865	AX-94759517	GG	GG	GG	GG	GG	GG	GG	GG	GG	CC	GG	GG	GG	GG	GG	GG	GG	GG	CC	GG	GG	GG	GG	CC	GG	GG	CC	GG	GG	GG	GG	GG	GG	GG	GG	GG	GG	GG	GG	NN	GG
67	Awn_Col	AX-95097131	1B	AGCAGCCAAGCCTCCTACACGCGTCCTCCGCCAGG[A/C]TCCTCTAGGCTCGAGTTGCTCAAGTGTTTCAGCGG	A	C	BA00131873	AX-95097131	AA	AA	AA	AA	AA	AA	AA	AA	AA	AA	AA	AA	AA	AA	AA	AA	AA	AA	AA	AA	AA	AA	AA	AA	AA	AA	AA	AA	AA	AA	AA	AA	AA	AA	AA	AA	AA	AA	AA	AA	AA
68	Awn_Att	AX-94519690	5A	TCGCCTCATTGTGGCCTCAACTGGGTGTGATGAAG[C/T]CTGTTGGAGTTGAGTTTGTGCTTTGGTTCATTTGA	T	C	BA00764929	AX-94519690	TT	TT	CC	TT	TT	TT	TT	TT	TT	TT	TT	TT	TT	TT	TT	TT	TT	TT	TT	TT	TT	TT	TT	TT	TT	TT	TT	TT	CC	TT	TT	TT	TT	TT	TT	TT	TT	TT	TT	TT	TT
69	Awn_Att	AX-94453668	5A	CAAAAGAAGTTCGTCACAACGAAATATCGAGATAC[C/T]GCTACCTCATATAAACAAATAACAAGAAAGATGTT	T	C	BA00400527	AX-94453668	TT	TT	CC	TT	TT	TT	TT	TT	TT	TT	TT	TT	TT	TT	TT	TT	TT	TT	TT	TT	TT	TT	TT	TT	TT	TT	TT	TT	CC	TT	TT	TT	TT	TT	TT	TT	TT	TT	TT	TT	TT
70	Awn_Att	AX-94613491	5A	GGCTTTGAGCTCTGTATCAGCATCGGCATCCTCAT[C/T]GCGAACGTCATCAACTATGGAGTGCAGAAAATCGA	T	C	BA00316142	AX-94613491	TT	TT	CC	TT	TT	TT	TT	TT	TT	TT	TT	TT	TT	TT	TT	TT	TT	TT	TT	TT	TT	TT	TT	TT	TT	TT	TT	TT	CC	TT	TT	TT	TT	TT	TT	TT	TT	TT	TT	TT	TT
71	Glu_Pub	AX-94506140	1A	AGAAGGCCATTAGCTTAATTTGGATGTCGCGTGGC[C/T]GGCACCATTATCGTAAATTTTGTTCTGCACTAAGT	T	C	BA00690185	AX-94506140	CC	TT	TT	CC	CC	CC	CC	TT	CC	CC	CC	CC	CC	CC	CC	CC	CC	CC	CC	CC	TT	TT	CC	CC	CC	CC	CC	CC	TT	CC	CC	CC	CC	CC	CC	CC	CC	CC	CC	CC	CC
72	Glu_Pub	AX-94618537	1A	TTTCATAGCAGAATATGCTAGTAGTATGTCTTTAC[C/G]ATTTACCCTGTTCCCACCAACTAATAGGGATAGCT	C	G	BA00340948	AX-94618537	CC	CC	CC	CC	CC	GG	CC	GG	CC	CC	GG	CC	CC	CC	GG	GG	CC	CC	CC	CC	CC	CC	CC	CC	CC	CC	CC	CC	CC	CC	GG	CC	CC	CC	CC	GG	CC	CC	CC	CC	CC
73	Glu_Pub	AX-94626335	1B	GATTGAGCGAGAGTAAGGCACATGTCAGGTAGTTG[A/G]GGATAAAGGTGTGCCTGTTAGTGGTTGATCATCTT	A	G	BA00379141	AX-94626335	AA	GG	AA	AA	AA	AA	AA	GG	AA	AA	AA	AA	AA	AA	AA	AA	AA	AA	AA	AA	AA	AA	AA	AA	AA	AA	AA	AA	AA	AA	AA	AA	AA	AA	AA	AA	AA	AA	GG	AA	AA
74	Glu_Pub	AX-94664731	1B	GATCTTTCGAACTCCAGGAAGGAATACATGAAATG[C/T]TTGCAGAACCGCACGAATACTGAGGTTGGCTGGGT	T	C	BA00564547	AX-94664731	TT	TT	TT	TT	TT	CC	TT	TT	TT	TT	CC	TT	TT	TT	CC	TT	TT	TT	TT	TT	CC	CC	TT	TT	TT	TT	TT	TT	TT	CC	CC	CC	TT	TT	TT	CC	TT	TT	TT	TT	TT
75	Glu_Pub	AX-95255429	2B	GTAGGGCTCTGTATGTTGCCCTTATCTTGTTCTCC[A/G]GAATACAATGCCTTCATCTGAGCTAGAGCTGTCCA	A	G	BA00893721	AX-95255429	AA	GG	AA	AA	AA	AA	AA	AA	AA	AA	AA	AA	AA	AA	AA	AA	AA	AA	AA	AA	AA	AA	AA	AA	AA	AA	AA	GG	AA	AA	AA	AA	AA	AA	AA	AA	NN	AA	AA	AA	AA
76	Glu_Pub	AX-94852847	2B	GCAGCAGCTGTCAGACGATTACTAAAACAAACACG[A/G]CACAATTACGGTAGAAAATAAATAATCCAGCCAGC	A	G	BA00319083	AX-94852847	AA	GG	AA	AA	AA	AA	AA	AA	AA	AA	AA	AA	AA	AA	AA	AA	AA	AA	AA	AA	AA	AA	AA	AA	AA	AA	AA	GG	AA	AA	AA	AA	AA	AA	AA	AA	NN	AA	AA	AA	AA
77	Glu_Pub	AX-95023665	2B	TGCAGGTACACGGGGAAGTCGGAGTTGTTTGTCAC[C/G]AGCACTGCGCCGGGCGCGCCCAGGGCCTCGTCCCA	C	G	BA00796145	AX-95023665	CC	CC	CC	CC	CC	CC	CC	GG	CC	CC	CC	CC	CC	CC	CC	CC	CC	CC	CC	CC	CC	CC	CC	CC	CC	CC	CC	CC	CC	CC	CC	CC	CC	GG	CC	CC	NN	CC	CC	GG	CC
78	Ear_Col	AX-94980178	1B	TTTAATGGCAAGAGATGGGAAAAATTCAATAGCGA[A/G]AAGGTGGCGACACTCGCGTATGCTAGAATCCAGGG	A	G	BA00675168	AX-94980178	GG	GG	GG	GG	GG	GG	GG	GG	GG	GG	GG	GG	GG	GG	GG	GG	GG	GG	GG	GG	GG	GG	GG	GG	GG	GG	GG	GG	GG	GG	GG	GG	GG	GG	GG	GG	GG	GG	GG	GG	GG
79	Sh_Wid	AX-94654809	2D	TGGACCTCTCGACCGTGGTGCAGGACATGGCCTAC[A/G]TTGGGTTCTCCTCGGCAACGGGAGCCCTCTTCACA	A	G	BA00516119	AX-94654809	GG	GG	GG	GG	GG	GG	GG	GG	GG	GG	GG	GG	GG	GG	GG	GG	GG	GG	GG	GG	GG	GG	GG	GG	GG	GG	GG	GG	GG	GG	GG	GG	GG	NN	GG	GG	GG	GG	GG	NN	GG
80	Grn_Ph	AX-94634529	2A	TTCTGTAATTTGCCGCTTCTAATTCTGTAATCTGG[C/T]GCCATATTGTACTAGTACTCAGCTACTAGTTGTGG	T	C	BA00418101	AX-94634529	TT	TT	CC	TT	CC	CC	CC	CC	TT	TT	CC	TT	CC	CC	CC	CC	TT	TT	TT	CC	CC	CC	CC	TT	TT	TT	TT	TT	CC	TT	CC	TT	NN	CC	TT	CC	TT	CC	TT	TT	CC
81	Grn_Ph	AX-94608674	2A	AAAGACGGCACACTAATCGCAGTGAAGGTTCTGTC[A/G]GCCACTTCAAGGCAAGGCGTCCGAGAGTTCTTGAC	A	G	BA00292574	AX-94608674	GG	GG	GG	GG	GG	GG	GG	GG	GG	GG	GG	GG	GG	GG	GG	GG	GG	GG	GG	GG	GG	GG	GG	GG	GG	GG	AA	GG	GG	GG	GG	GG	GG	GG	GG	GG	GG	GG	GG	GG	GG
82	Grn_Ph	AX-94825053	2A	GAATCGATATAATGCAGATCCGCCTGTAGTCCAGA[A/T]GCAAATTAATCATCCTTTTGAGGTCATTAGATGAG	A	T	BA00241573	AX-94825053	TT	TT	AA	TT	AA	TT	AA	AA	TT	TT	TT	TT	AA	AA	AA	AA	TT	TT	TT	AA	TT	AA	AA	TT	TT	TT	TT	TT	AA	TT	AA	TT	AA	AA	TT	AA	TT	AA	TT	TT	AA
83	Grn_Ph	AX-94738314	2A	GGTGTGATGATAAATAAATCTTGCATCCGATGGTT[A/T]GGCTTGGGAAGTATTTGTCGTGGTGAC	A	T	BA00795722	AX-94738314	TT	TT	TT	TT	TT	AA	AA	AA	TT	TT	AA	TT	AA	TT	AA	AA	TT	TT	TT	AA	AA	TT	AA	TT	TT	TT	AA	TT	AA	NN	AA	TT	TT	TT	TT	AA	TT	TT	TT	TT	TT
84	Grn_Ph	AX-95205011	2A	GAGTCAGAGATGCCGGAACTGCTGGAGCTCGTCTT[C/T]AACGTGTGGGTGGACAAGCTGCTGTATGCGGGCAC	T	C	BA00656572	AX-95205011	CC	CC	TT	CC	TT	CC	CC	CC	CC	CC	CC	CC	CC	TT	CC	CC	CC	CC	CC	CC	CC	TT	CC	CC	CC	CC	TT	CC	CC	CC	CC	CC	CC	TT	CC	CC	CC	TT	CC	CC	TT
85	Grn_Ph	AX-94833084	2A	GAAGGTCATGTCGGTGACGTGGATGCTAGTGACGT[C/T]GCCCTCACCGACGTAGCGGCCGAGGCTACCGACGC	T	C	BA00264174	AX-94833084	CC	CC	TT	CC	TT	CC	CC	CC	CC	CC	CC	CC	CC	TT	CC	CC	CC	CC	CC	CC	CC	TT	CC	CC	CC	CC	TT	CC	CC	CC	CC	CC	TC	TT	CC	CC	CC	TT	CC	CC	TT
86	Grn_Ph	AX-94635076	2A	TCAACCGCGGCTTCAGGGGCTGCATGGAGTACCCG[A/C]GGGCGTCCCAGAAGCACAGCCTGAAGGAGAAGCTC	A	C	BA00420761	AX-94635076	CC	CC	AA	CC	AA	CC	CC	CC	CC	CC	CC	CC	CC	AA	CC	CC	CC	CC	CC	CC	CC	AA	CC	CC	CC	CC	AA	CC	CC	CC	CC	CC	NN	AA	CC	CC	CC	AA	CC	CC	AA
87	Grn_Ph	AX-94750566	2A	AGTGAGGTACATGCAGAATTTACCGAGACCTTTTT[C/T]GCCCACATGTGCGGTCAAGACGTTGTCACCTGTTT	T	C	BA00033598	AX-94750566	CC	CC	TT	CC	TT	CC	CC	CC	CC	CC	CC	CC	CC	TT	CC	CC	CC	CC	CC	CC	CC	TT	CC	CC	CC	CC	CC	CC	CC	CC	CC	CC	TC	TT	CC	CC	CC	TT	CC	CC	TT
88	Grn_Ph	AX-94485323	2A	GGCCACATAAGAAGTTCATTGCTTAGCTAGGTCTG[C/T]GCATGATGACGATGTTATACGGTAGCTGTACATAT	T	C	BA00574697	AX-94485323	TT	CC	TT	TT	TT	TT	TT	CC	CC	CC	TT	CC	TT	TT	TT	TT	CC	TT	CC	TT	CC	TT	TT	CC	CC	CC	TT	CC	TT	CC	TT	CC	CC	TT	TT	TT	TT	TT	TT	CC	TT
89	Germ_Wid	AX-94921234	4A	GAGACTGCCTTTAACTTTTCCTAGGGCTCGTGATT[A/G]AACAAAGCACTAGCAGGCTGTGTTACGTGTTGTTA	A	G	BA00510408	AX-94921234	AA	GG	GG	AA	AA	GG	AA	GG	GG	AA	GG	AA	AA	AA	AA	GG	AA	AA	AA	GG	GG	GG	GG	GG	AA	AA	AA	AA	AA	AA	AA	GG	AA	AA	AA	GG	AA	AA	AA	AA	AA
90	Brush_L	AX-94623333	3A	CTTGTTTGCTCAGTGTAAAATGTGCTCTGCGAGGT[A/G]GGTTAGTTATTTATTGTGATTAGATGATAGGCGAG	A	G	BA00364750	AX-94623333	AA	GG	AA	GG	AA	AA	GG	AA	GG	GG	AA	GG	GG	GG	AA	AA	AA	GG	GG	GG	AA	GG	AA	GG	GG	AA	GG	GG	GG	AA	AA	GG	GG	AA	GG	AA	AA	AA	GG	GG	GG
91	Grn_Size	AX-95154008	7B	CTCCTCACTCCCAACGCCACTGCCTTCGGAACACG[C/G]TGCTCTTCTTCGTGGCATTGAGTTCAAGCAGGGTC	C	G	BA00406528	AX-95154008	CC	CC	GG	GG	CC	GG	CC	CC	GG	CC	CC	CC	CC	CC	GG	CC	CC	CC	CC	CC	CC	CC	CC	CC	CC	CC	CC	CC	CC	NN	CC	CC	CC	CC	CC	CC	CC	CC	CC	CC	CC
92	Grn_Size	AX-95002032	1A	TGCACTTCGCTGATTTGGATCTAACAACTAAAGCC[A/C]TGTCCACAAAGACAAGTGAAAACTGCTTTGCCATT	A	C	BA00735893	AX-95002032	AA	CC	AA	AA	AA	CC	AA	CC	CC	AA	CC	AA	AA	AA	CC	CC	AA	AA	NN	AA	AA	AA	CC	AA	AA	AA	AA	AA	CC	AA	CC	AA	AA	AA	AA	CC	AA	AA	AA	AA	AA
93	Grn_Tex	AX-94471990	6B	CACAGGCATCACTGCTAAGAGTCTGCATGCACAAT[A/C]CAACCGTAAACATGTTAAGAGAGCGGCAAATGAGG	A	C	BA00501119	AX-94471990	AA	AA	AA	AA	AA	CC	AA	AA	AA	AA	CC	AA	AA	AA	CC	AA	AA	AA	AA	AA	CC	AA	AA	AA	AA	AA	AA	AA	AA	AA	CC	AA	AA	AA	AA	CC	AA	AA	AA	AA	AA
94	Grn_Tex	AX-94451759	6B	TGACAAAGCAGCCAGGTCAAACAGCGAAGGTGACT[C/G]TGGGTCAAATAAGTGTGTCTAAGGATGATGAATCT	C	G	BA00389770	AX-94451759	CC	CC	CC	CC	CC	GG	CC	CC	CC	CC	GG	CC	CC	CC	GG	CC	CC	CC	CC	CC	GG	CC	CC	CC	CC	CC	CC	CC	CC	CC	GG	CC	CC	CC	CC	GG	CC	CC	CC	CC	CC
95	Grn_Tex	AX-95148325	6B	GGATGTGGGAGAGGCACATTTGATATGCTTATCTT[C/G]TCAAGGAATCGTATTGATTTGGAATGAATCAGAGA	C	G	BA00379267	AX-95148325	CC	CC	CC	CC	CC	GG	CC	CC	CC	CC	GG	CC	CC	CC	GG	CC	CC	CC	CC	CC	GG	CC	CC	CC	CC	CC	CC	CC	CC	CC	GG	CC	CC	CC	CC	GG	CC	CC	CC	CC	CC
96	Grn_Tex	AX-95086436	6B	GTTTCCGAGGCGACAGTTTTGCAGCGCTGGAAACC[A/G]TAGCTAGGGTCGAATGATGTTGCCGTCCCCTGTTA	A	G	BA00079518	AX-95086436	AA	AA	AA	AA	AA	GG	AA	AA	AA	AA	GG	AA	AA	AA	GG	AA	AA	AA	AA	AA	GG	AA	AA	AA	AA	AA	AA	AA	AA	AA	GG	AA	AA	AA	AA	GG	AA	AA	AA	AA	AA
97	Grn_Tex	AX-95172836	7A	GTTGTAGAATCGGTGGAGATGAGGTTACATGCACA[C/T]GAGGACCAATTGCGAAGGGAAGGCGCACATGACGT	T	C	BA00499950	AX-95172836	TT	TT	TT	TT	TT	TT	TT	TT	TT	TT	TT	TT	TT	TT	TT	TT	TT	TT	TT	TT	TT	TT	CC	TT	TT	TT	TT	TT	TT	TT	TT	TT	TT	TT	TT	TT	TT	TT	TT	TT	TT
98	Grn_Tex	AX-94464653	7A	AGCTGGGTGTATTCTCCACTACAATGTAACGACGT[A/G]CAGCCTGATGCTGTGCAATGTGAGTTCTGAAATGA	A	G	BA00460736	AX-94464653	GG	GG	GG	GG	GG	GG	GG	GG	GG	GG	GG	GG	GG	GG	GG	GG	GG	GG	GG	GG	GG	GG	AA	GG	GG	GG	GG	GG	GG	GG	GG	GG	GG	GG	AA	GG	GG	GG	GG	GG	GG
99	Grn_Tex	AX-94583333	7A	GTACATCCAAGAAATATGAACATCTTACAACAACA[A/G]CAAATTCTCCAACCCTATAAATGCGGGCGAACCTA	A	G	BA00168415	AX-94583333	GG	GG	GG	GG	GG	GG	GG	GG	GG	GG	GG	GG	GG	GG	GG	GG	GG	GG	GG	GG	GG	GG	AA	GG	GG	GG	GG	GG	GG	GG	GG	GG	GG	GG	AA	GG	GG	GG	GG	GG	GG
100	DTH	AX-94542441	4A	CCACATCACCTCATGATTCAAGGTCCACATTAAGA[G/T]ATATGAACTTACTGTTTGTCAAATTTGTGTTTCAG	T	G	BA00889339	AX-94542441	TT	GG	GG	TT	TT	TT	TT	TT	TT	TT	TT	TT	TT	TT	TT	TT	TT	TT	GG	TT	GG	TT	TT	TT	TT	TT	TT	TT	TT	TT	TT	TT	TT	TT	TT	TT	TT	TT	TT	TT	TT
101	DTH	AX-94699167	5A	CGTCACTGACCGGATTGTGCCTGAGTAAGGTCATA[C/T]GTGGAGAGCGTGCCGGACTGGTCAACGTCGAGTTT	T	C	BA00732773	AX-94699167	CC	CC	TT	CC	CC	TT	CC	TT	CC	CC	TT	TT	CC	CC	TT	TT	CC	TT	TT	CC	TT	TT	CC	TT	TT	CC	CC	CC	CC	TT	TT	TT	CC	CC	CC	TT	CC	CC	CC	TT	CC
102	DTH	AX-95025549	5A	TTGCTGGCAACAGAAACGCCAGCTATGGCCTTCAC[C/T]AAGGTGTCGAGGTTCCCCTTTTCAGAGCTTTCTGC	T	C	BA00801274	AX-95025549	TT	CC	TT	CC	TT	CC	TT	CC	TT	TT	NN	TT	CC	TT	CC	CC	CC	TT	CC	TT	CC	TT	CC	CC	TT	TT	TT	TT	CC	CC	CC	TT	TT	TT	TT	CC	TT	TT	CC	TT	TT
103	DTH	AX-95187165	5A	TTCCTCCGGGAGGCCTACTATAAAGGGGAGCTTTT[A/G]GATTCCAATGAGATACATGACGCAAGGCGGAAGCT	A	G	BA00569644	AX-95187165	AA	AA	GG	AA	AA	AA	AA	AA	AA	GG	AA	AA	AA	AA	AA	AA	AA	AA	GG	AA	AA	GG	AA	GG	AA	AA	AA	AA	AA	AA	AA	AA	GG	AA	AA	AA	AA	AA	AA	AA	AA
104	DTH	AX-94508292	7D	GGATCGATCGGTGCATGTATGGTTATGACTTATGA[A/G]AGAGGTGAGTGAATTTCTAATTGTTTGGGTATAGC	A	G	BA00701959	AX-94508292	GG	AA	AA	AA	AA	AA	AA	AA	AA	GG	AA	AA	AA	AA	AA	AA	AA	GG	GG	AA	AA	AA	GG	AA	GG	AA	GG	AA	AA	AA	AA	GG	AA	AA	GG	AA	AA	AA	AA	AA	AA
105	DTM	AX-95652739	1A	CCTTAGATCTGTTCGTCCCTACTCCGTCTATTTCC[A/G]TTTCCTTTACGTTGCTCCTAGGGATGACTGAAAAT	A	G	BA00425298	AX-94458193	AA	GG	AA	AA	AA	AA	AA	AA	GG	AA	AA	AA	AA	AA	AA	GG	GG	AA	AA	AA	AA	AA	GG	GG	AA	AA	AA	AA	AA	GG	AA	AA	AA	AA	AA	AA	GG	AA	GG	AA	AA
106	DTM	AX-94656878	2A	TGCACAACGCATCACATAACTCCACGGAGAACCTC[A/C]CCTCCAGTCAGTCCGATAAGGTCAAGAACAGAAGG	A	C	BA00526144	AX-94656878	AA	AA	CC	AA	AA	AA	AA	CC	AA	AA	AA	AA	AA	AA	AA	AA	AA	AA	AA	AA	CC	AA	AA	AA	AA	AA	AA	AA	AA	AA	AA	AA	AA	AA	AA	AA	AA	AA	AA	AA	AA
107	DTM	AX-94463225	2A	TCGGATGTGCTGGAGAAGATGATGGATGATGAACC[A/C]GGGCTGGCTGCCCTCGGAAGCGATTACAACCTCTG	A	C	BA00452985	AX-94463225	CC	CC	CC	AA	CC	CC	CC	CC	CC	CC	CC	CC	CC	CC	CC	CC	AA	CC	AA	CC	CC	CC	CC	AA	CC	CC	AA	CC	CC	AA	CC	AA	CC	CC	CC	CC	AA	CC	CC	CC	CC
108	DTM	AX-94657523	2A	TGAACCAGGGCTGGCTGCCCTCGGAAGCGATTACA[A/T]CCTCTGAGATGAATAGGTTTCATGACCTGCCAGAT	A	T	BA00529399	AX-94657523	TT	TT	TT	AA	TT	TT	TT	TT	TT	TT	TT	TT	TT	TT	TT	TT	AA	TT	AA	TT	TT	TT	TT	AA	TT	TT	AA	TT	TT	AA	TT	AA	TT	TT	TT	TT	AA	TT	TT	TT	TT
109	DTM	AX-94681125	3B	GAAGCCGAAGGGTCAAAGTTAAGGAGGGATGTTTC[C/T]GCAGAAGGCAATGTTGGTGCAGGGCCCTCTACTAG	T	C	BA00644460	AX-94681125	CC	CC	CC	CC	CC	TT	CC	TT	CC	CC	CC	CC	CC	CC	TT	TT	CC	CC	CC	CC	TT	CC	CC	TT	CC	CC	TT	TT	CC	NN	TT	CC	CC	CC	CC	TT	CC	CC	CC	CC	CC
110	DTM	AX-95115735	3B	CTAGCAAATATTTCAGAAATGCGTCAAGCCTTCCA[A/G]TCCAATATGTTCACTTTCACTGACAAGCCAATGAC	A	G	BA00222157	AX-95115735	GG	GG	GG	GG	GG	AA	GG	AA	GG	GG	AA	GG	GG	GG	AA	AA	GG	GG	GG	GG	AA	GG	AA	GG	GG	GG	GG	GG	GG	NN	AA	GG	GG	GG	GG	AA	GG	GG	GG	GG	GG
111	DTM	AX-94541758	3B	ATAAAGACAAAGGCTAATTTTGAGATGTGAGATTA[A/G]ATCAAAATACTGCCCCGTCTGTTTCCTTTGTGCCT	A	G	BA00885623	AX-94541758	GG	GG	GG	GG	GG	AA	GG	AA	GG	GG	AA	GG	GG	GG	AA	AA	GG	AA	GG	GG	AA	GG	AA	GG	GG	GG	GG	GG	GG	AA	AA	GG	GG	GG	GG	AA	GG	GG	GG	GG	GG
112	DTM	AX-94542441	4A	CCACATCACCTCATGATTCAAGGTCCACATTAAGA[G/T]ATATGAACTTACTGTTTGTCAAATTTGTGTTTCAG	T	G	BA00889339	AX-94542441	TT	GG	GG	TT	TT	TT	TT	TT	TT	TT	TT	TT	TT	TT	TT	TT	TT	TT	GG	TT	GG	TT	TT	TT	TT	TT	TT	TT	TT	TT	TT	TT	TT	TT	TT	TT	TT	TT	TT	TT	TT
113	DTM	AX-95652310	5A	AAGCTGATCAAGGGGTTCTCTGAAATTGATGGTGG[A/G]CAGTTTATTGGGATAAAGAAAATGGGGAAACTAAG	A	G	BA00145049	AX-94407396	AA	GG	AA	GG	AA	GG	AA	GG	AA	AA	GG	AA	GG	AA	GG	GG	GG	AA	GG	AA	GG	AA	GG	GG	AA	AA	AA	AA	GG	GG	GG	AA	AA	AA	AA	GG	AA	AA	GG	AA	AA
114	DTM	AX-95187165	5A	TTCCTCCGGGAGGCCTACTATAAAGGGGAGCTTTT[A/G]GATTCCAATGAGATACATGACGCAAGGCGGAAGCT	A	G	BA00569644	AX-95187165	AA	AA	GG	AA	AA	AA	AA	AA	AA	GG	AA	AA	AA	AA	AA	AA	AA	AA	GG	AA	AA	GG	AA	GG	AA	AA	AA	AA	AA	AA	AA	AA	GG	AA	AA	AA	AA	AA	AA	AA	AA
115	DTM	AX-95229606	6A	GTGTGTTGATTGTAGGCCTACAAGTTGCATCAGAG[A/C]TTTGGATTCTCTTCTGAGATTCTATCACTTATTAT	A	C	BA00768611	AX-95229606	CC	AA	CC	CC	CC	AA	CC	CC	CC	AA	AA	CC	CC	AA	AA	AA	CC	AA	CC	CC	AA	CC	CC	AA	AA	AA	CC	CC	AA	CC	AA	CC	CC	CC	AA	AA	AA	CC	CC	AA	AA
116	DTM	AX-95653321	6B	ATTGGTTTCCCTTTTCAAGAAAGGAGATGTTATCT[A/G]TGACATGTTTGCTGGTATTGGCCCATTTTCTATCC	A	G	BA00635500	AX-94496316	GG	AA	GG	AA	AA	AA	AA	GG	GG	AA	AA	GG	GG	AA	AA	NN	AA	AA	AA	GG	AA	AA	AA	GG	GG	GG	AA	GG	AA	GG	AA	AA	AA	AA	AA	AA	AA	AA	AA	AA	AA
117	PH	AX-95652981	1B	GCCCTCTGCTGAACAAATTAGAATCCAAAACAAAT[A/G]ATTCTTAGGCACTGATATTAATGACATGTTTGTTT	A	G	BA00516082	AX-94474766	GG	GG	AA	GG	GG	GG	GG	GG	GG	GG	NN	GG	GG	GG	GG	GG	GG	GG	GG	GG	GG	GG	GG	GG	GG	GG	GG	GG	GG	GG	GG	GG	GG	GG	GG	GG	GG	GG	AA	GG	GG
118	PH	AX-94656878	2A	TGCACAACGCATCACATAACTCCACGGAGAACCTC[A/C]CCTCCAGTCAGTCCGATAAGGTCAAGAACAGAAGG	A	C	BA00526144	AX-94656878	AA	AA	CC	AA	AA	AA	AA	CC	AA	AA	AA	AA	AA	AA	AA	AA	AA	AA	AA	AA	CC	AA	AA	AA	AA	AA	AA	AA	AA	AA	AA	AA	AA	AA	AA	AA	AA	AA	AA	AA	AA
119	PH	AX-94841650	2B	ACGCCATTAGCGCCGAGTTTGTATAGGTTTCCCCT[A/G]CAGGAGGAGTTCACTGACAGTTTGGAACACCCAAA	A	G	BA00287844	AX-94841650	AA	AA	AA	GG	AA	AA	GG	AA	AA	AA	AA	AA	AA	AA	AA	AA	AA	AA	AA	AA	AA	AA	AA	AA	AA	GG	AA	AA	AA	AA	AA	AA	GG	AA	AA	AA	GG	NN	AA	GG	AA
120	PH	AX-94737415	5D	TCTTCCGTATGTGTTGCAATGGGCAAAAACAAGAG[C/T]TGCAGGCATGCATGGTCCTAAACCGATACAATAAA	T	C	BA00920370	AX-94737415	CC	CC	CC	CC	CC	CC	CC	TT	CC	CC	CC	CC	CC	CC	TT	TT	CC	CC	CC	CC	TT	CC	CC	CC	CC	CC	CC	CC	CC	CC	CC	CC	CC	CC	CC	CC	CC	CC	CC	CC	CC
121	PH	AX-95170041	5D	AAAACTGCTGCAGTCGCCTTGTTCTACTGTACAAT[C/T]GACAGTAACGAGTCTGGGCAGATTCTTTATCCCGA	T	C	BA00486174	AX-95170041	TT	TT	TT	TT	TT	TT	TT	CC	TT	TT	TT	TT	TT	TT	TT	CC	TT	TT	TT	TT	CC	TT	TT	TT	TT	TT	TT	TT	CC	TT	TT	TT	TT	TT	TT	TT	TT	TT	TT	TT	TT
122	PH	AX-94941145	7A	GGTGAGGTGCCAGAGGTCCAGCAAGAGGTGTGTCC[A/G]ACAACGATAGAGCAGCGACGCGCTGCCTGCGGCGG	A	G	BA00566206	AX-94941145	AA	GG	GG	GG	GG	GG	AA	GG	GG	GG	AA	GG	GG	NN	GG	GG	AA	AA	GG	NN	GG	GG	GG	AA	GG	GG	GG	GG	AA	GG	GG	GG	GG	AA	AA	GG	GG	NN	GG	GG	NN
123	SL	AX-94981940	1B	GGACAGAGTGTGCCAGCTTCCAACAATTCCTATGC[C/T]GTGAATATGGGTGGCCCAAATCAGTTTGGGCAGCA	T	C	BA00680134	AX-94981940	TT	CC	TT	TT	TT	TT	TT	CC	TT	CC	TT	TT	TT	TT	TT	TT	CC	CC	TT	CC	TT	TT	TT	CC	CC	CC	CC	TT	TT	TT	TT	TT	TT	TT	CC	TT	TT	TT	CC	CC	TT
124	SL	AX-94544160	1B	AGTCCCCTTGACAGCAACAAGATACTCCATCGGCG[C/G]TCTGGGTCTTCCAACTACTACCAGTTGGTACCCTT	C	G	BA00899057	AX-94544160	GG	CC	GG	GG	GG	GG	GG	CC	GG	CC	GG	GG	GG	GG	GG	GG	CC	CC	GG	CC	GG	GG	GG	CC	CC	CC	CC	GG	GG	GG	GG	GG	GG	GG	CC	GG	GG	GG	CC	CC	GG
125	SL	AX-94561972	1B	TAGATCCAGCCTCGTTTCTTCCACGTTCTTGCCTT[A/C]CTCCTTCCCGCCATCCAAGAAAAGAGAATTTCCTT	A	C	BA00064795	AX-94561972	AA	CC	AA	AA	AA	AA	AA	CC	AA	CC	AA	AA	AA	AA	AA	AA	CC	CC	AA	CC	AA	AA	AA	CC	CC	CC	CC	AA	AA	AA	AA	AA	AA	AA	CC	AA	AA	AA	AA	CC	AA
126	SL	AX-94517196	2A	GTGCCATACTCTGGGAACCTTCCTTGGACTCAGTA[C/G]CGGAAAAAGGCATGATGTTTGGATCAAACATCTAC	C	G	BA00751255	AX-94517196	CC	GG	CC	CC	CC	GG	CC	GG	CC	CC	GG	CC	GG	CC	GG	GG	CC	CC	CC	CC	GG	CC	CC	CC	CC	CC	CC	CC	CC	GG	GG	CC	CC	CC	CC	GG	CC	CC	CC	CC	CC
127	SL	AX-94702246	2A	ATAGTGGAATGTGTAAATGATCTTGTAAGTTCCTA[A/T]AGTAAAGGGATTCCGACAGATGCTTGAAACGTGTG	A	T	BA00747971	AX-94702246	AA	TT	AA	AA	AA	TT	AA	TT	AA	AA	TT	AA	TT	AA	TT	TT	AA	AA	AA	AA	TT	AA	AA	AA	AA	AA	AA	AA	AA	TT	TT	AA	AA	NN	AA	TT	AA	AA	AA	AA	AA
128	SL	AX-94491035	2A	CAAAGTAGAATAGAAGCAGCGTATGTTAGGCAAAA[G/T]ATTGCTTTAGCCATTGGTGTTATTGTCCTAGAAAA	T	G	BA00606581	AX-94491035	TT	GG	TT	TT	TT	GG	TT	GG	TT	TT	GG	TT	GG	TT	GG	GG	TT	TT	TT	TT	GG	TT	TT	TT	TT	TT	TT	TT	TT	GG	GG	TT	TT	TT	TT	GG	TT	TT	TT	TT	TT
129	SL	AX-95101251	2A	CGACTTATCAAGCCGGCGACTTCGGTCATCTCCTC[C/T]TGATGCACCTTCCCACTACCAGAAAGCAACAAGGG	T	C	BA00152128	AX-95101251	TT	CC	TT	TT	TT	CC	TT	CC	TT	TT	CC	TT	CC	TT	CC	CC	TT	TT	TT	TT	CC	TT	TT	TT	TT	TT	TT	TT	TT	CC	CC	TT	TT	TT	TT	CC	TT	TT	TT	TT	TT
130	SL	AX-94539318	3A	TTTCAGGCGCCAAGTTGGATGAACTTTAGGGATTG[C/T]TTGTTTGTTTAGCACGATTTCATTACTAAGATGTA	T	C	BA00872049	AX-94539318	TT	TT	CC	TT	TT	CC	TT	CC	TT	TT	CC	TT	TT	TT	CC	CC	TT	TT	TT	TT	CC	TT	TT	TT	TT	TT	TT	TT	TT	CC	CC	TT	TT	TT	TT	CC	TT	TT	TT	TT	TT
131	SL	AX-95252004	3B	GGTCGGGGGAGCAGTGTCCGGCGCCATGTTGCACC[G/T]GCGCAAGAAGAGGTTGGGCAAGGTATGCGGTGGAG	T	G	BA00877030	AX-95252004	TT	GG	TT	TT	TT	GG	TT	GG	TT	TT	GG	TT	TT	TT	GG	GG	TT	GG	TT	TT	GG	TT	GG	GG	TT	TT	TT	TT	GG	NN	GG	TT	TT	TT	TT	GG	TT	TT	TT	TT	TT
132	SL	AX-94390305	3D	ACATGCCCAAATCAAATGTCAAAGAATTCTTGGCA[A/T]ACGATATCACAACAATACATACTCTTTCCAAACAT	A	T	BA00050608	AX-94390305	AA	AA	AA	AA	AA	TT	AA	TT	TT	TT	TT	AA	TT	AA	AA	AA	AA	AA	AA	TT	AA	AA	AA	AA	AA	AA	AA	AA	TT	TT	AA	AA	TT	AA	AA	TT	AA	AA	AA	TT	AA
133	SL	AX-94722223	5A	AAGAGGAAGTTCATGAACGTTGTCATCCTTTAGAG[C/T]GTAAGCATATCATCAGTGACAGCTTAAGAGGCGTT	T	C	BA00845985	AX-94722223	TT	NN	CC	CC	TT	TT	TT	TT	TT	TT	TT	TT	NN	TT	CC	CC	TT	CC	TT	TT	TT	TT	CC	CC	TT	TT	TT	TT	TT	TT	CC	CC	TT	TT	TT	TT	TT	TT	TT	TT	TT
134	SL	AX-94976078	7A	TGTACCTGTATTTCCATTCGCGGGGTCAAAATCAT[C/T]TTTCTCCATATACATCGGGTCGAGTCATGCCTAGT	T	C	BA00663586	AX-94976078	TT	TT	CC	TT	TT	TT	TT	CC	TT	CC	CC	TT	TT	TT	TT	TT	TT	CC	TT	TT	TT	TT	TT	TT	TT	TT	TT	CC	TT	CC	TT	TT	TT	TT	TT	CC	TT	TT	TT	TT	TT
135	SL	AX-94551053	7B	CCCGAGAGGATGGTTGCCAAGGTGGAGCCGCTCGT[C/T]AACATGGGCCAGATATCCAGGGCCACCTGCCCGAT	T	C	BA00011911	AX-94551053	CC	CC	TT	CC	CC	CC	CC	CC	CC	CC	CC	CC	CC	CC	CC	TT	CC	CC	CC	CC	CC	CC	CC	CC	CC	CC	CC	CC	TT	CC	CC	CC	CC	CC	CC	CC	CC	CC	CC	CC	CC
136	Awn_L	AX-94844716	1B	CTGATCAGCGACGCGGTGTCAACAGATCCTTCCTG[C/T]CTCTGGACCGAGATACTGCAGCTGATGGGAGGGCA	T	C	BA00296434	AX-94844716	TT	CC	TT	TT	TT	TT	TT	TT	TT	TT	NN	TT	TT	TT	CC	CC	TT	TT	TT	TT	CC	TT	TT	TT	TT	TT	TT	TT	TT	TT	CC	TT	TT	TT	TT	TT	TT	TT	TT	TT	TT
137	Awn_L	AX-94401263	3B	CTGGGGATCATGAATGTGTCTTGGGCTGAGTTTAA[G/T]TCCATTTTGGTGCTACACTACTTATCCTGTCTAAA	T	G	BA00110700	AX-94401263	TT	TT	TT	TT	TT	TT	TT	TT	TT	TT	TT	TT	TT	TT	GG	GG	TT	TT	TT	TT	TT	TT	GG	TT	TT	TT	TT	TT	TT	TT	GG	TT	TT	TT	TT	GG	TT	TT	TT	TT	TT
138	Awn_L	AX-94807852	4B	TGAGTTGATCAACACTCACCAGTTCAACACTTTCC[A/G]GATCAGTAAACATATTAGCCACACTTGAATCAACA	A	G	BA00193398	AX-94807852	AA	GG	AA	AA	AA	AA	AA	GG	AA	AA	AA	AA	AA	AA	AA	AA	GG	AA	GG	AA	AA	AA	AA	AA	AA	AA	AA	AA	AA	AA	AA	AA	GG	AA	AA	AA	AA	AA	AA	AA	AA
139	Awn_L	AX-94895991	4B	CCTCGGTGGTTACTGGGAATCCAGAGAAAAGAGCA[A/G]CTGGGACGGCTGCCCTGACATTTTCGGACAACTTC	A	G	BA00440111	AX-94895991	AA	GG	AA	AA	AA	AA	AA	GG	AA	AA	AA	AA	AA	AA	AA	AA	GG	AA	GG	AA	AA	AA	AA	AA	AA	AA	AA	AA	GG	AA	AA	AA	GG	AA	AA	AA	AA	AA	AA	AA	AA
140	Awn_L	AX-94594057	6D	AGCTGCTGGGCTACATGGAGTTGTTTTTGTTTAAA[A/C]CATATGATCTTGACGCTACCCATTTTTCCCTGTCA	A	C	BA00220805	AX-94594057	CC	AA	AA	AA	CC	AA	CC	AA	CC	CC	AA	CC	AA	AA	AA	AA	CC	AA	CC	CC	CC	CC	AA	CC	CC	AA	NN	CC	CC	AA	AA	CC	AA	AA	CC	AA	AA	AA	CC	CC	AA
141	Awn_L	AX-94474462	6D	TCAGAACTCGGAGTCGGGACAACTCAACAAGGGAA[A/C]GAGGAGCCTCAAGGGAGATACCTGCATAACACTGG	A	C	BA00514284	AX-94474462	AA	CC	CC	CC	AA	CC	AA	CC	AA	AA	CC	AA	CC	CC	CC	CC	AA	CC	AA	AA	AA	AA	CC	AA	AA	CC	AA	AA	AA	CC	CC	AA	CC	NN	AA	CC	AA	CC	AA	AA	CC
142	Awn_L	AX-95012310	7B	TGCCCTTCGGCGACCAGTTCTGGTTCAGGTTCCTC[C/T]TCGGCTGGCTGATGCCGCCCAAGGTGTCCCTGCTC	T	C	BA00764438	AX-95012310	TT	TT	CC	TT	TT	TT	TT	TT	TT	TT	TT	TT	TT	TT	TT	CC	TT	TT	TT	TT	TT	TT	TT	TT	TT	TT	TT	TT	CC	TT	TT	TT	TT	TT	TT	TT	TT	TT	TT	TT	TT
143	Awn_L	AX-95025537	7B	TGCCCTTCGGCGACCAGTTCTGGTTCAGGTTCCTC[C/T]TCGGCTGGCTGATGCCCCCCAAGGTGTCCCTGCTC	T	C	BA00801244	AX-95025537	TT	TT	CC	TT	TT	TT	TT	TT	TT	TT	TT	TT	TT	TT	TT	CC	TT	TT	TT	TT	TT	TT	TT	TT	TT	TT	TT	TT	CC	TT	TT	TT	TT	TT	TT	TT	TT	TT	TT	TT	TT
144	Leaf_L	AX-94675921	4A	CACACACAACCCTGGCAGATCAATAACTGATAGGC[G/T]ATGACTACCCAAGTCATACTTGATAATACAACTGT	T	G	BA00619031	AX-94675921	TT	TT	TT	TT	TT	TT	TT	TT	TT	TT	TT	TT	TT	TT	GG	TT	TT	TT	TT	TT	GG	TT	TT	TT	TT	TT	TT	TT	TT	TT	GG	TT	TT	TT	TT	GG	TT	TT	TT	TT	TT
145	Leaf_L	AX-94406861	5A	CGCTCTTGCTAGTTGCTAAACTTGCATATTTCTCT[C/G]TGTGTGTGTGGTAGTACCGTTTGTACCACGTA	C	G	BA00142019	AX-94406861	CC	CC	CC	GG	CC	CC	CC	CC	CC	CC	CC	CC	CC	CC	GG	CC	CC	CC	CC	CC	CC	CC	GG	CC	CC	CC	CC	CC	CC	GG	GG	CC	CC	CC	CC	CC	CC	CC	CC	CC	CC
146	Leaf_L	AX-95196340	7B	CTGCCAACCCGCTACAAGTGTACAAGGCCTTCCGC[A/G]TTCAAGCTGAGAGGGCAAGAAAATTCAATTGTTAA	A	G	BA00614455	AX-95196340	GG	AA	GG	AA	GG	GG	AA	GG	GG	GG	GG	AA	GG	GG	AA	GG	AA	AA	GG	GG	GG	GG	AA	GG	AA	AA	GG	AA	GG	GG	GG	AA	GG	GG	AA	AA	AA	GG	AA	AA	GG
[truncated: 361 more columns]
